# Supplementary material for: A proficient multivariate approach for iron(ii) spin crossover behaviour modelling in the solid state
Source: Royal Society of Chemistry journal article supplement (doi:10.1039/d3dt00847a), 2023-01-01
Supplement: d3dt00847a1.pdf [file d3dt00847a1.pdf]

## Proficient multivariate approach for iron(II) spin crossover behaviour modelling in the solid state

Lorenzo Marchi, Simone Fantuzzi, Andrea Cingolani, Alessandro Messori, Rita Mazzoni, Stefano Zacchini, Marina Cocchi and Luca Rigamonti

### ELECTRONIC SUPPLEMENTARY INFORMATION (ESI)

#### Index

- Pag. S3 **Table S1** Rules for the three-letter labels of the iron(II) complexes.
- Pag. S6 **Fig. S1** Drawing of the substituents R of complexes  $[\text{Fe}(\text{bpp-R})_2](\text{X})_2 \cdot \text{solvent}$  with relative letter+number coding, and anions  $[\text{Ni}(\text{mnt})_2]^-$  and  $[\text{Co}(\text{carborane})_2]^-$ .
- Pag. S8 **Table S2**  $[\text{Fe}(\text{bpp-R})_2](\text{X})_2 \cdot \text{solvent}$  complexes known in the literature.
- Pag. S21 **Table S3** The 28 structural parameters considered for building the PCA and PLS models.
- Pag. S22 **Chemometrics methods**
- Pag. S26 **Experimental Section**
- Pag. S27 **Table S4** Crystallographic and refinement data for **C01AA** at 100 and 293 K.
- Pag. S28 **Table S5** Coordination bond distances and angles of **C01AA** at 100 and 293 K.
- Pag. S29 **Fig. S2** PC1 vs PC2 Scores plot for the PCA model constructed including all the variables D, A and T for the selected 83 HS complexes; the symbol legend corresponds to the R groups.
- Pag. S30 **Fig. S3** PC1 vs PC2 Scores plot for the PCA model constructed including all the variables D, A and T for the selected 83 HS complexes; the symbol legend corresponds to the anions  $\text{X}^-$ .
- Pag. S31 **Fig. S4** PC1 vs PC2 Scores plot for the PCA model constructed including all the variables D, A and T for the selected 83 HS complexes; the symbol legend corresponds to the co-crystallized solvents.
- Pag. S32 **Fig. S5** PC1 vs. PC2 Loadings plot for the PCA model constructed including all the variables D, A and T for the selected 83 HS complexes.
- Pag. S32 **Fig. S6** PC1 vs. PC2 Loadings plot for the PCA model constructed including all the variables D, A and T for the selected 39 solvent-free (SF) HS complexes.
- Pag. S33 **Fig. S7** PC1 vs PC2 Scores and Loadings plots for the PCA model constructed including all the variables D, A and T for the 17 HS complexes with  $\text{R} = \text{S-}i\text{Pr}$ ; the symbol legend corresponds to the co-crystallized solvents.

Pag. S34 **Fig. S8** Root Mean Square Errors in Calibration (RMSEC) and in Cross-Validation (RMSECV) vs Latent Variable Number Plot.

Pag. S34 **Fig. S9** PLS regression model based on 34 structures of iron(II) complexes: weights plot LV1 vs LV2.

Pag. S35 **Fig. S10**  $T_{1/2}$  values distribution in the PC1 vs PC2 Scores plots across the PCA models constructed with the 83 HS complexes and the 39 SF HS derivatives.

Pag. S36 **Reference**

**Table S1** Rules for the three-letter labels of the iron(II) complexes, where the first letter+number combination identifies the substituent R (H = hydrogen, X = halogens, N = substituents bound through nitrogen to the pyridyl ring, O = substituents bound through oxygen to the pyridyl ring, S = substituents bound through sulphur to the pyridyl ring, C = substituents bound through carbon to the pyridyl ring, A = bound substituted aromatic rings, M = substituents containing fragments with coordinated metal ions), the second letter represents the anion  $X^-$ , and the third letter the co-crystallized solvent. For example, **H01AA** corresponds to  $[\text{Fe}(\text{bpp-H})_2](\text{BF}_4)_2$  without co-crystallized solvent molecules (solvent free, SF), while **C01BC** corresponds to  $[\text{Fe}(\text{bpp-Me})_2](\text{BF}_4)_2 \cdot 4\text{MeNO}_2$ ; when more than one type of co-crystallized solvent is present, the letter identifies the one in the highest amount. Graphical representation of the substituents R and anions  $[\text{Ni}(\text{mnt})_2]^-$  and  $[\text{Co}(\text{carborane})_2]^-$  is reported in Fig. S1. The substituents in italics and red do not have any crystal structure determination available.

| Letter+number | Substituent R                                                                                                   |
|---------------|-----------------------------------------------------------------------------------------------------------------|
| <b>H01</b>    | H                                                                                                               |
| <b>X01</b>    | F                                                                                                               |
| <b>X02</b>    | Cl                                                                                                              |
| <b>X03</b>    | Br                                                                                                              |
| <b>X04</b>    | I                                                                                                               |
| <b>N01</b>    | NH <sub>2</sub>                                                                                                 |
| <b>N02</b>    | NMe <sub>2</sub>                                                                                                |
| <b>N03</b>    | <i>NO<sub>2</sub></i>                                                                                           |
| <b>N04</b>    | NHCOMe                                                                                                          |
| <b>N05</b>    | Thiomorpholine                                                                                                  |
| <b>N06</b>    | <i>E</i> -N=N-Ph                                                                                                |
| <b>O01</b>    | OH                                                                                                              |
| <b>O02</b>    | OMe                                                                                                             |
| <b>S01</b>    | <i>SH</i>                                                                                                       |
| <b>S02</b>    | SMe                                                                                                             |
| <b>S03</b>    | S- <i>i</i> Pr                                                                                                  |
| <b>S04</b>    | S- <i>t</i> Bu                                                                                                  |
| <b>S05</b>    | <i>SOMe</i>                                                                                                     |
| <b>S06</b>    | <i>SO<sub>2</sub>Me</i>                                                                                         |
| <b>S07</b>    | <i>S(CH<sub>2</sub>)<sub>2</sub>NHC(O)(CH<sub>2</sub>)<sub>4</sub>(C<sub>3</sub>H<sub>5</sub>S<sub>2</sub>)</i> |
| <b>S08</b>    | <i>bridging S-S (proposed tetranuclear iron(II) compound)</i>                                                   |
| <b>C01</b>    | Me                                                                                                              |
| <b>C02</b>    | CH <sub>2</sub> OH                                                                                              |
| <b>C03</b>    | CH <sub>2</sub> Br                                                                                              |
| <b>C04</b>    | CH <sub>2</sub> SCN                                                                                             |
| <b>C05</b>    | C≡N                                                                                                             |
| <b>C06</b>    | COOH                                                                                                            |

|     |                                                                                              |
|-----|----------------------------------------------------------------------------------------------|
| C07 | COOH (on position 3)                                                                         |
| C08 | COOMe                                                                                        |
| C09 | COOMe (on position 3)                                                                        |
| C10 | COOEt                                                                                        |
| C11 | CONH(CH <sub>2</sub> OH) <sub>3</sub>                                                        |
| C12 | CONHCH <sub>2</sub> COOH                                                                     |
| C13 | CONH(CH <sub>2</sub> ) <sub>2</sub> COOH                                                     |
| C14 | CSNH <sub>2</sub>                                                                            |
| C15 | CSNHMe                                                                                       |
| C16 | COOC <sub>6</sub> H <sub>4</sub> OH                                                          |
| C17 | COOC <sub>6</sub> H <sub>4</sub> OMe                                                         |
| C18 | COOC <sub>6</sub> H <sub>3</sub> (OH) <sub>2</sub>                                           |
| C19 | COOC <sub>6</sub> H <sub>3</sub> (OMe) <sub>2</sub>                                          |
| C20 | COOC <sub>6</sub> H <sub>4</sub> OC <sub>6</sub> H <sub>13</sub>                             |
| C21 | <i>COOC<sub>6</sub>H<sub>4</sub>OC<sub>12</sub>H<sub>25</sub></i>                            |
| C22 | COOC <sub>6</sub> H <sub>4</sub> OC <sub>14</sub> H <sub>29</sub>                            |
| C23 | COOC <sub>6</sub> H <sub>4</sub> OC <sub>16</sub> H <sub>33</sub>                            |
| C24 | <i>COOC<sub>6</sub>H<sub>4</sub>OC<sub>18</sub>H<sub>37</sub></i>                            |
| C25 | COOCH <sub>2</sub> Ph                                                                        |
| C26 | COOCH <sub>2</sub> C <sub>6</sub> H <sub>4</sub> OMe                                         |
| C27 | COOCH <sub>2</sub> C <sub>6</sub> H <sub>3</sub> (OMe) <sub>2</sub>                          |
| C28 | <i>COOC<sub>12</sub>H<sub>25</sub></i>                                                       |
| C29 | <i>COOC<sub>14</sub>H<sub>29</sub></i>                                                       |
| C30 | <i>COOC<sub>16</sub>H<sub>33</sub></i>                                                       |
| C31 | <i>COOC<sub>18</sub>H<sub>37</sub></i>                                                       |
| C32 | C≡CH                                                                                         |
| C33 | C≡C–SiMe <sub>3</sub>                                                                        |
| C34 | C≡C–SC(O)Me                                                                                  |
| C35 | C≡C–Ph                                                                                       |
| C36 | C≡C–C <sub>6</sub> H <sub>4</sub> SC(O)Me                                                    |
| C37 | bridging C≡C–anthracene–C≡C (tetranuclear iron(II) compound)                                 |
| C38 | bridging C≡C–anthracene–C≡C–anthraquinone–C≡C–anthracene–C≡C (hexanuclear iron(II) compound) |
| C39 | <i>E</i> -CH=CH–Ph                                                                           |
| C40 | <i>Z</i> -CH=CH–Ph                                                                           |
| C41 | <i>E</i> -CH=CH–C <sub>6</sub> H <sub>4</sub> CN                                             |
| C42 | <i>Z</i> -CH=CH–C <sub>6</sub> H <sub>4</sub> CN                                             |
| C43 | <i>E</i> -CH=CH–C <sub>6</sub> H <sub>4</sub> NO <sub>2</sub>                                |
| C44 | <i>Z</i> -CH=CH–C <sub>6</sub> H <sub>4</sub> NO <sub>2</sub>                                |
| C45 | <i>E</i> -CH=CH–Fc                                                                           |
| C46 | <i>E</i> -CH=CH–Tetrathiofulvalene (TTF)                                                     |
| C47 | Nitrosyl nitroxide                                                                           |
| C48 | <i>CH<sub>2</sub>OC(O)(CH<sub>2</sub>)<sub>3</sub>pyrene</i>                                 |
| C49 | <i>COO(CH<sub>2</sub>)<sub>4</sub>pyrene</i>                                                 |
| C50 | <i>COOCH<sub>2</sub>pyrene</i>                                                               |
| C51 | <i>CH<sub>2</sub>OC(O)CH<sub>2</sub>pyrene</i>                                               |

|            |                                                                                                                   |
|------------|-------------------------------------------------------------------------------------------------------------------|
| <b>C52</b> | <i>CH<sub>2</sub>OC(O)(CH<sub>2</sub>)<sub>4</sub>(C<sub>3</sub>H<sub>5</sub>S<sub>2</sub>)</i>                   |
| <b>C53</b> | <i>CONH(CH<sub>2</sub>)<sub>2</sub>OC(O)(CH<sub>2</sub>)<sub>4</sub>(C<sub>3</sub>H<sub>5</sub>S<sub>2</sub>)</i> |
| <b>C54</b> | <i>COO(CH<sub>2</sub>)<sub>2</sub>OC(O)(CH<sub>2</sub>)<sub>4</sub>(C<sub>3</sub>H<sub>5</sub>S<sub>2</sub>)</i>  |
| <b>A01</b> | 4-C <sub>6</sub> H <sub>4</sub> OH                                                                                |
| <b>A02</b> | 4-C <sub>6</sub> H <sub>4</sub> CHO                                                                               |
| <b>A03</b> | 4-C <sub>6</sub> H <sub>4</sub> C≡N                                                                               |
| <b>A04</b> | Pyrazol-1-yl                                                                                                      |
| <b>A05</b> | Imidazol-1-yl                                                                                                     |
| <b>A06</b> | Pyrid-4-yl                                                                                                        |
| <b>A07</b> | Pyrid-3-yl                                                                                                        |
| <b>A08</b> | Pyrene                                                                                                            |
| <b>A09</b> | <i>Cyclotriphosphazene (CTPZ)</i>                                                                                 |
| <b>A10</b> | <i>4-C<sub>6</sub>H<sub>4</sub>CH<sub>2</sub>OC(O)C(fullerene)COOEt</i>                                           |
| <b>M01</b> | C≡C–Pt(4- <i>t</i> Bu-Terpy)                                                                                      |
| <b>M02</b> | <i>CONHC(CH<sub>2</sub>O)<sub>3</sub>POM, POM = MnMo<sub>6</sub>O<sub>24</sub> (1D polymeric chain)</i>           |

| Letter label | Anion X <sup>-</sup>                                                |
|--------------|---------------------------------------------------------------------|
| <b>A</b>     | BF <sub>4</sub> <sup>-</sup>                                        |
| <b>B</b>     | ClO <sub>4</sub> <sup>-</sup>                                       |
| <b>C</b>     | TfO <sup>-</sup>                                                    |
| <b>D</b>     | PF <sub>6</sub> <sup>-</sup>                                        |
| <b>E</b>     | AsF <sub>6</sub> <sup>-</sup>                                       |
| <b>F</b>     | SbF <sub>6</sub> <sup>-</sup>                                       |
| <b>G</b>     | BPh <sub>4</sub> <sup>-</sup>                                       |
| <b>H</b>     | I <sup>-</sup> /I <sub>3</sub> <sup>-</sup>                         |
| <b>I</b>     | [Ni(mnt) <sub>2</sub> ] <sup>-</sup> (mnt = maleonitriledithiolate) |
| <b>J</b>     | [Co(carborane) <sub>2</sub> ] <sup>-</sup>                          |

| Letter label | Solvent                         |
|--------------|---------------------------------|
| <b>A</b>     | SF (solvent free)               |
| <b>B</b>     | H <sub>2</sub> O                |
| <b>C</b>     | MeNO <sub>2</sub>               |
| <b>D</b>     | MeCN                            |
| <b>E</b>     | Me <sub>2</sub> CO              |
| <b>F</b>     | MeOH                            |
| <b>G</b>     | Et <sub>2</sub> O               |
| <b>H</b>     | CH <sub>2</sub> Cl <sub>2</sub> |
| <b>I</b>     | EtCN                            |
| <b>J</b>     | PhCN                            |
| <b>K</b>     | Propylene carbonate (PC)        |



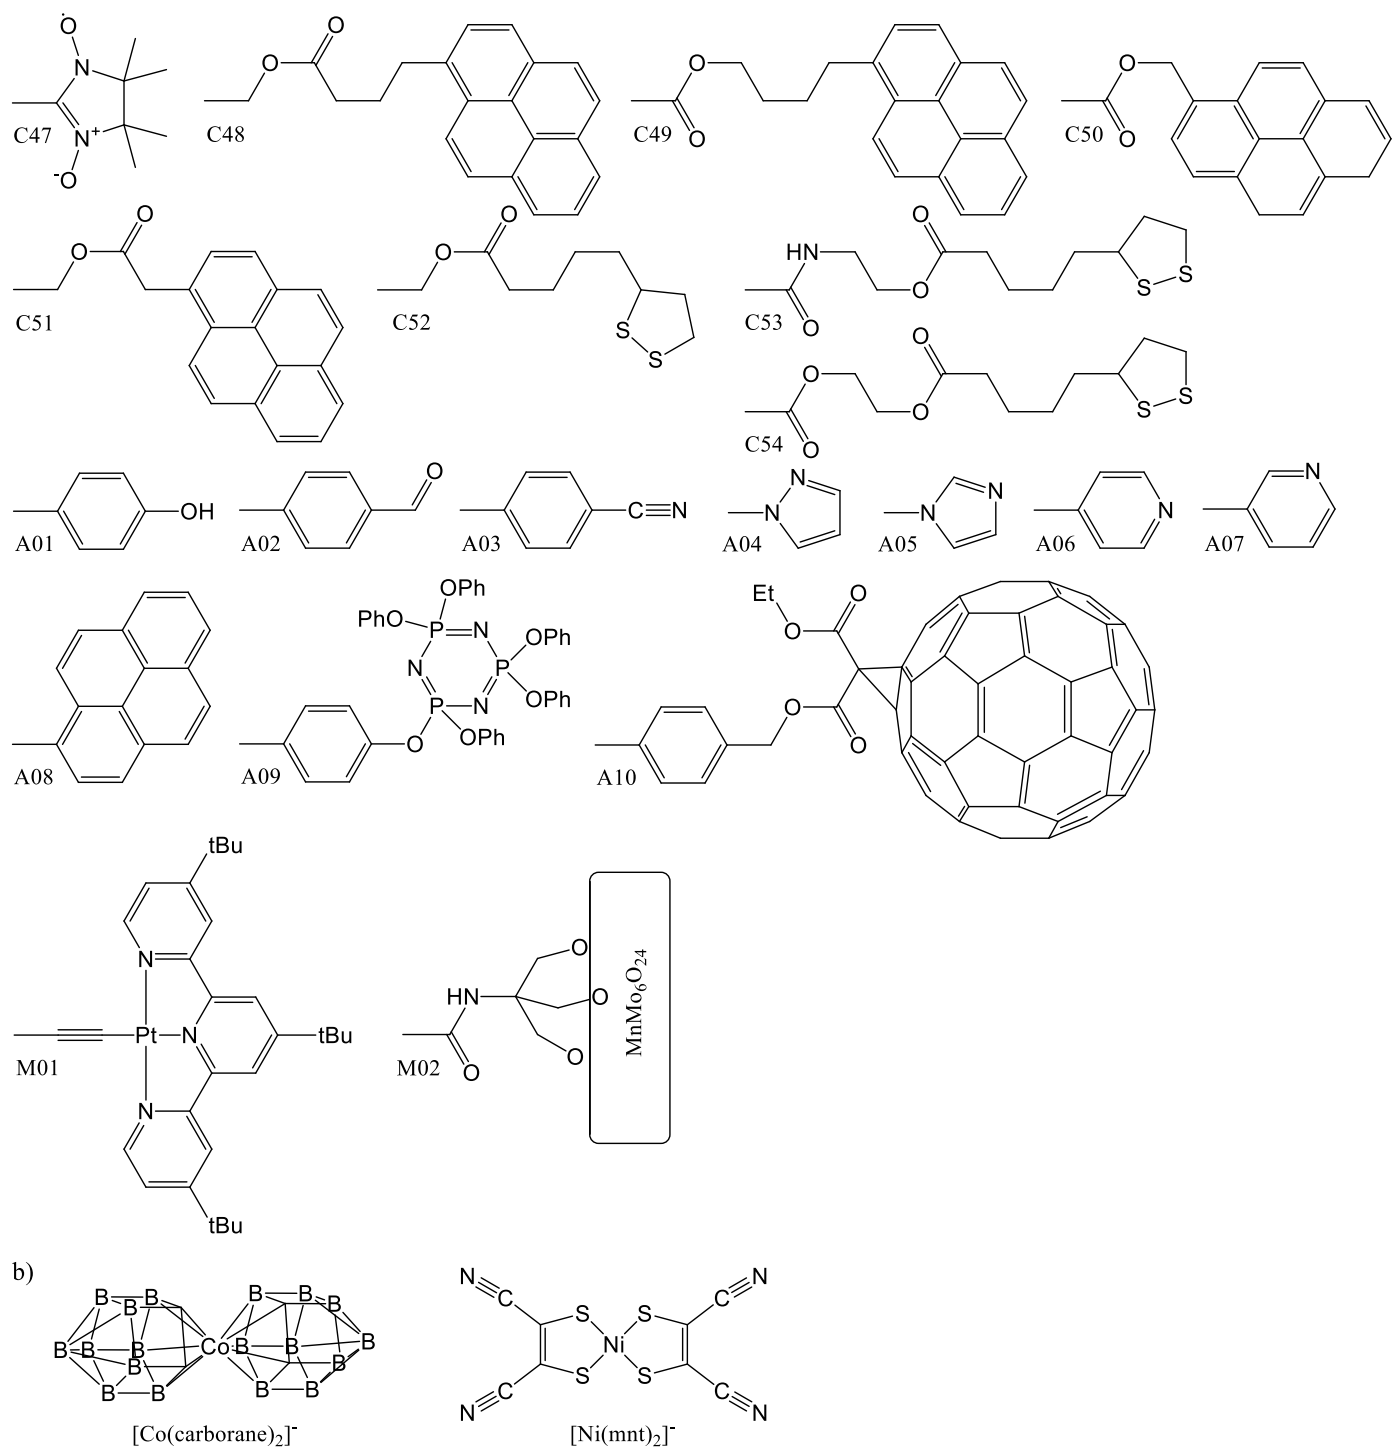

**Fig. S1** Drawing of the a) substituents R of complexes  $[\text{Fe}(\text{bpp-R})_2](\text{X})_2 \cdot \text{solvent}$  with relative letter+number coding, and b)  $[\text{Co}(\text{carborane})_2]^-$  and  $[\text{Ni}(\text{mnt})_2]^-$  anions.

**Table S2** Iron(II) complexes [Fe(bpp-R)<sub>2</sub>](X)<sub>2</sub>·solvent known in the literature. The compounds in bold are the ones employed in this study.

| label        | year | R                  | X <sup>-</sup>                                    | solvent                                                    | CCDC/CSD           | T <sub>RX</sub><br>(K) | Spin<br>state | SCO                   | ref |
|--------------|------|--------------------|---------------------------------------------------|------------------------------------------------------------|--------------------|------------------------|---------------|-----------------------|-----|
| <b>H01AA</b> | 2001 | H                  | BF <sub>4</sub> <sup>-</sup>                      | SF                                                         | 158392<br>XENBEX01 | 375                    | HS            | Yes (261)             | 1   |
| <b>H01AA</b> | 2001 | H                  | BF <sub>4</sub> <sup>-</sup>                      | SF                                                         | 158393<br>XENBEX   | 290                    | HS            | Yes (261)             | 1   |
| H01AA        | 2001 | H                  | BF <sub>4</sub> <sup>-</sup>                      | SF                                                         | 158394<br>XENBEX02 | 240                    | LS            | Yes (261)             | 1   |
| H01AA        | 2001 | H                  | BF <sub>4</sub> <sup>-</sup>                      | SF                                                         | 158395<br>XENBEX03 | 150                    | LS            | Yes (261)             | 1   |
| H01AC        | 2002 | H                  | BF <sub>4</sub> <sup>-</sup>                      | 2.9CH <sub>3</sub> NO <sub>2</sub><br>0.25H <sub>2</sub> O | 171144<br>ADIYOB   | 150                    | LS            | Yes (≈260)<br>[a1]    | 2   |
| <b>H01DA</b> | 2002 | H                  | PF <sub>6</sub> <sup>-</sup>                      | SF                                                         | 171145<br>ADIYUH   | 120                    | HS            | No (HS)               | 2   |
| H01AA        | 2003 | H                  | BF <sub>4</sub> <sup>-</sup>                      | SF                                                         | 195715<br>XENBEX04 | 30                     | LS            | Yes (261)             | 3   |
| H01AA        | 2003 | H                  | BF <sub>4</sub> <sup>-</sup>                      | SF                                                         | 195714<br>XENBEX05 | 30                     | HS [a2]       | Yes (261)<br>LIESST   | 3   |
| <b>C02AA</b> | 2004 | CH <sub>2</sub> OH | BF <sub>4</sub> <sup>-</sup>                      | SF                                                         | 229751<br>IYUFOX01 | 300                    | HS            | Yes (271)             | 4   |
| C02AA        | 2004 | CH <sub>2</sub> OH | BF <sub>4</sub> <sup>-</sup>                      | SF                                                         | 229749<br>IYUFOX   | 30                     | LS            | Yes (271)             | 4   |
| C02AA        | 2004 | CH <sub>2</sub> OH | BF <sub>4</sub> <sup>-</sup>                      | SF                                                         | 229750<br>IYUFOX02 | 30                     | HS [a2]       | Yes (271)<br>LIESST   | 4   |
| <b>H01BA</b> | 2005 | H                  | ClO <sub>4</sub> <sup>-</sup>                     | SF                                                         | 263420<br>GAPSIA   | 150                    | HS            | No (HS)               | 5   |
| <b>H01FA</b> | 2005 | H                  | SbF <sub>6</sub> <sup>-</sup>                     | SF                                                         | 263421<br>GAPSOG   | 150                    | HS            | No (HS)               | 5   |
| <b>H01HA</b> | 2006 | H                  | 0.5I <sup>-</sup> ·1.5I <sub>3</sub> <sup>-</sup> | SF                                                         | 278897<br>ECELAA   | 150                    | HS            | No (HS)               | 6   |
| <b>H01JC</b> | 2006 | H                  | [Co(carborane) <sub>2</sub> ] <sup>2-</sup>       | CH <sub>3</sub> NO <sub>2</sub>                            | 278898<br>ECELEE   | 300                    | mixed<br>[a3] | Partial (50%,<br>300) | 6   |
| <b>H01JC</b> | 2006 | H                  | [Co(carborane) <sub>2</sub> ] <sup>2-</sup>       | CH <sub>3</sub> NO <sub>2</sub>                            | 278899<br>ECELEE01 | 150                    | mixed<br>[a3] | Partial (300,<br>50%) | 6   |
| <b>C02BA</b> | 2006 | CH <sub>2</sub> OH | ClO <sub>4</sub> <sup>-</sup>                     | SF                                                         | 296687<br>NESVOX   | 340                    | HS            | Yes (284)             | 7   |
| C02BA        | 2006 | CH <sub>2</sub> OH | ClO <sub>4</sub> <sup>-</sup>                     | SF                                                         | 296688<br>NESVOX01 | 30                     | LS            | Yes (284)             | 7   |
| C02BA        | 2006 | CH <sub>2</sub> OH | ClO <sub>4</sub> <sup>-</sup>                     | SF                                                         | 296689<br>NESVOX02 | 30                     | HS [a2]       | Yes (284)<br>(LIESST) | 7   |
| A06BF        | 2006 | py (4)             | ClO <sub>4</sub> <sup>-</sup>                     | MeOH                                                       | 234927<br>CETYIK   | 180                    | LS            | Yes (287) [a4]        | 8   |



|              |      |                                              |                                      |                                         |                    |     |               |                        |    |
|--------------|------|----------------------------------------------|--------------------------------------|-----------------------------------------|--------------------|-----|---------------|------------------------|----|
| <b>H01AA</b> | 2007 | H                                            | BF <sub>4</sub> <sup>-</sup>         | SF                                      | 631320<br>XENBEX06 | 300 | HS            | Yes (259) [a5]         | 9  |
| H01AA        | 2007 | H                                            | BF <sub>4</sub> <sup>-</sup>         | SF                                      | 631321<br>XENBEX07 | 150 | LS            | Yes (259) [a5]         | 9  |
| A03AD        | 2007 | C <sub>6</sub> H <sub>4</sub> CN (4)         | BF <sub>4</sub> <sup>-</sup>         | 2MeCN                                   | 634174<br>YIKNUC   | 180 | LS [a6]       | Yes (166) [a7]         | 10 |
| A03AD        | 2007 | C <sub>6</sub> H <sub>4</sub> CN (4)         | BF <sub>4</sub> <sup>-</sup>         | 2MeCN                                   | 634175<br>YIKNUC01 | 180 | LS [a6]       | Yes (166) [a7]         | 10 |
| A03AD        | 2007 | C <sub>6</sub> H <sub>4</sub> CN (4)         | ClO <sub>4</sub> <sup>-</sup>        | 2MeCN                                   | 634176<br>YIKPAK   | 150 | LS            | Yes (179) [a7]         | 10 |
| <b>C45AG</b> | 2007 | <i>E</i> -CH=CH-Fc                           | BF <sub>4</sub> <sup>-</sup>         | 2Et <sub>2</sub> O                      | 829371<br>ARIXEF   | 110 | HS            | Partial <20%<br>(≈100) | 11 |
| C45AG        | 2007 | <i>E</i> -CH=CH-Fc                           | BF <sub>4</sub> <sup>-</sup>         | Et <sub>2</sub> O                       | 829372<br>ARIXIJ   | 110 | LS            | Yes (230)              | 11 |
| C45AG        | 2007 | <i>E</i> -CH=CH-Fc                           | BF <sub>4</sub> <sup>-</sup>         | Et <sub>2</sub> O                       | 829373<br>ARIXIJ01 | 293 | HS /<br>mixed | Yes (230)              | 11 |
| C47AE        | 2007 | Nitrosyl<br>nitroxide                        | BF <sub>4</sub> <sup>-</sup>         | Me <sub>2</sub> CO                      | 278362<br>TICXUZ   | 200 | LS            | No (LS up to<br>RT)    | 12 |
| X04BA        | 2008 | I                                            | ClO <sub>4</sub> <sup>-</sup>        | SF                                      | 682057<br>COMRAY   | 180 | LS            | Yes (333)              | 13 |
| A01BA        | 2008 | 4-C <sub>6</sub> H <sub>4</sub> OH           | ClO <sub>4</sub> <sup>-</sup>        | SF                                      | 682058<br>COMREC   | 180 | LS            | Yes (281)              | 13 |
| C33BD        | 2008 | C≡C-SiMe <sub>3</sub>                        | ClO <sub>4</sub> <sup>-</sup>        | 2MeCN                                   | 682059<br>COMRIG   | 180 | mixed         | Partial 50%<br>(≈220)  | 13 |
| C33BD        | 2008 | C≡C-SiMe <sub>3</sub>                        | ClO <sub>4</sub> <sup>-</sup>        | 2MeCN                                   | not deposited      | 298 | HS            | Partial 50%<br>(≈220)  | 13 |
| C32BA        | 2008 | C≡CH                                         | ClO <sub>4</sub> <sup>-</sup>        | SF                                      | 682060<br>COMROM   | 180 | LS            | No (LS up to<br>380 K) | 13 |
| C36BH        | 2008 | C≡C-C <sub>6</sub> H <sub>4</sub><br>SC(O)Me | ClO <sub>4</sub> <sup>-</sup>        | 3CH <sub>2</sub> Cl <sub>2</sub>        | 668334<br>XOCFIF   | 180 | LS            | Yes (277)              | 14 |
| <b>C45HA</b> | 2008 | <i>E</i> -CH=CH-Fc                           | I <sub>3</sub> <sup>-</sup>          | SF                                      | 676598<br>POLLAE   | 200 | HS            | No (HS)                | 15 |
| <b>C45GC</b> | 2008 | <i>E</i> -CH=CH-Fc                           | BPh <sub>4</sub> <sup>-</sup>        | 3MeNO <sub>2</sub><br>Et <sub>2</sub> O | 676599<br>POLLEI   | 200 | HS            | No (HS)                | 15 |
| <b>C45IA</b> | 2008 | <i>E</i> -CH=CH-Fc                           | [Ni(mnt) <sub>2</sub> ] <sup>-</sup> | SF                                      | 676600<br>POLLIM   | 200 | HS            | No (HS)                | 15 |
| <b>H01HA</b> | 2009 | H                                            | I <sub>3</sub> <sup>-</sup>          | SF                                      | 734793<br>OZOGIV   | 293 | HS            | No (HS)                | 16 |
| <b>H01AA</b> | 2009 | H                                            | BF <sub>4</sub> <sup>-</sup>         | SF                                      | 722725<br>XENBEX08 | 300 | HS            | Yes (259) [a8]         | 17 |
| <b>C04AA</b> | 2009 | CH <sub>2</sub> SCN                          | BF <sub>4</sub> <sup>-</sup>         | SF                                      | 699523<br>FOYYAU   | 100 | HS            | No (HS) [a9]           | 18 |
| <b>C04AA</b> | 2009 | CH <sub>2</sub> SCN                          | BF <sub>4</sub> <sup>-</sup>         | SF                                      | 699524<br>FOYYAU01 | 313 | HS            | No (HS)                | 18 |
| C04AA        | 2009 | CH <sub>2</sub> SCN                          | BF <sub>4</sub> <sup>-</sup>         | SF                                      | 699525<br>FOYYAU02 | 100 | LS            | Yes (272) [a9]         | 18 |

|              |      |                       |                                                                       |                                         |                    |     |               |                     |    |
|--------------|------|-----------------------|-----------------------------------------------------------------------|-----------------------------------------|--------------------|-----|---------------|---------------------|----|
| C04AA        | 2009 | CH <sub>2</sub> SCN   | BF <sub>4</sub> <sup>-</sup>                                          | SF                                      | 699526<br>FOYYAU03 | 150 | LS            | Yes (272)           | 18 |
| C04AA        | 2009 | CH <sub>2</sub> SCN   | BF <sub>4</sub> <sup>-</sup>                                          | SF                                      | 699527<br>FOYYAU04 | 200 | LS            | Yes (272)           | 18 |
| C04AA        | 2009 | CH <sub>2</sub> SCN   | BF <sub>4</sub> <sup>-</sup>                                          | SF                                      | 699528<br>FOYYAU05 | 278 | HS /<br>mixed | Yes (272)           | 18 |
| <b>C04AA</b> | 2009 | CH <sub>2</sub> SCN   | BF <sub>4</sub> <sup>-</sup>                                          | SF                                      | 699529<br>FOYYAU06 | 313 | HS            | Yes (272)           | 18 |
| A07BA        | 2010 | py (3)                | ClO <sub>4</sub> <sup>-</sup>                                         | SF                                      | 764304<br>YUZTIX   | 180 | LS            | Yes (406)           | 19 |
| A07AA        | 2010 | py (3)                | BF <sub>4</sub> <sup>-</sup>                                          | SF                                      | 764305<br>YUZTOD   | 180 | LS            | Yes (400)           | 19 |
| A07AB        | 2010 | py (3)                | BF <sub>4</sub> <sup>-</sup>                                          | H <sub>2</sub> O MeCN                   | 764306<br>YUZTUJ   | 180 | LS            | Yes (≈300)<br>[a10] | 19 |
| <b>H01IC</b> | 2010 | H                     | [Ni(mnt) <sub>2</sub> ] <sup>-</sup>                                  | MeNO <sub>2</sub>                       | 691358<br>LUXMOH   | 200 | HS            | Yes (175)           | 20 |
| H01IC        | 2010 | H                     | [Ni(mnt) <sub>2</sub> ] <sup>-</sup>                                  | MeNO <sub>2</sub>                       | 691359<br>LUXMOH01 | 140 | LS            | Yes (175)           | 20 |
| <b>H01IC</b> | 2010 | H                     | [Ni(mnt) <sub>2</sub> ] <sup>-</sup>                                  | MeNO <sub>2</sub>                       | 691360<br>LUXMOH02 | 205 | HS            | Yes (175)           | 20 |
| <b>H01IC</b> | 2010 | H                     | [Ni(mnt) <sub>2</sub> ] <sup>-</sup>                                  | MeNO <sub>2</sub>                       | 691361<br>LUXMOH03 | 293 | HS            | Yes (175)           | 20 |
| H01IC        | 2010 | H                     | [Ni(mnt) <sub>2</sub> ] <sup>-</sup>                                  | MeNO <sub>2</sub>                       | 780979<br>LUXMOH04 | 180 | mixed         | Yes (175)           | 20 |
| <b>C40AA</b> | 2011 | Z-CH=CH-Ph            | BF <sub>4</sub> <sup>-</sup>                                          | SF                                      | 811070<br>ITECOA   | 90  | HS            | No (HS)             | 21 |
| C39AK        | 2011 | E-CH=CH-Ph            | BF <sub>4</sub> <sup>-</sup>                                          | 2PC [a11]                               | 811071<br>ITECUG   | 113 | LS            | Not tested<br>[a11] | 21 |
| C46GC        | 2011 | TTF [a12]             | BPh <sub>4</sub> <sup>-</sup>                                         | MeNO <sub>2</sub><br>½Et <sub>2</sub> O | 796347<br>AMIHUA   | 120 | LS            | Yes (≈200)          | 22 |
| C46IJ        | 2011 | TTF [a12,a13]         | 2[Ni(mnt) <sub>2</sub> ] <sup>-</sup><br>BF <sub>4</sub> <sup>-</sup> | PhCN                                    | 796348<br>AMIJAI   | 200 | LS            | Yes (≈240)          | 22 |
| C46IJ        | 2011 | TTF [a12,a13]         | 2[Ni(mnt) <sub>2</sub> ] <sup>-</sup><br>BF <sub>4</sub> <sup>-</sup> | PhCN                                    | 796349<br>AMIJAI01 | 300 | HS<br>(mixed) | Yes (≈240)          | 22 |
| <b>A08BA</b> | 2011 | pyrene                | ClO <sub>4</sub> <sup>-</sup>                                         | SF                                      | 790319<br>OVEPAH   | 180 | HS            | No (HS)             | 23 |
| C48AA        | 2011 | chain pyrene<br>[a14] | BF <sub>4</sub> <sup>-</sup>                                          | SF                                      | -                  | -   | -             | Yes (216)           | 23 |
| C48AB        | 2011 | chain pyrene<br>[a14] | BF <sub>4</sub> <sup>-</sup>                                          | H <sub>2</sub> O MeCN                   | -                  | -   | -             | Yes (218)           | 23 |
| C32AA        | 2012 | C≡CH                  | BF <sub>4</sub> <sup>-</sup>                                          | SF                                      | 846470<br>CAQFEH   | 180 | LS            | Yes (340)<br>[a15]  | 24 |
| C32AA        | 2012 | C≡CH                  | BF <sub>4</sub> <sup>-</sup>                                          | SF                                      | 846471<br>CAQFEH01 | 350 | LS<br>(mixed) | Yes (340)<br>[a15]  | 24 |
| C32AA        | 2012 | C≡CH                  | BF <sub>4</sub> <sup>-</sup>                                          | SF                                      | 846472<br>CAQFEH02 | 180 | LS            | Yes (≈450)<br>[a15] | 24 |

|              |      |                                                                   |                               |                        |                    |              |       |                     |    |
|--------------|------|-------------------------------------------------------------------|-------------------------------|------------------------|--------------------|--------------|-------|---------------------|----|
| <b>C32AA</b> | 2012 | C≡CH                                                              | BF <sub>4</sub> <sup>-</sup>  | SF                     | 846473<br>CAQFEH03 | 370          | HS    | Yes (340)<br>[a15]  | 24 |
| <b>C40AA</b> | 2012 | Z-CH=CH-Ph                                                        | BF <sub>4</sub> <sup>-</sup>  | SF                     | 811070<br>ITECOA   | 90           | HS    | No (HS)             | 25 |
| <b>C42AA</b> | 2012 | Z-CH=CH-<br>C <sub>6</sub> H <sub>4</sub> CN                      | BF <sub>4</sub> <sup>-</sup>  | SF                     | 892107<br>GAYBUF   | 113          | HS    | No (HS)             | 25 |
| C44AE        | 2012 | Z-CH=CH-<br>C <sub>6</sub> H <sub>4</sub> NO <sub>2</sub>         | BF <sub>4</sub> <sup>-</sup>  | Me <sub>2</sub> CO     | 892108<br>GAYGAM   | 113          | LS    | Yes (>300)          | 25 |
| C41AC        | 2012 | <i>E</i> -CH=CH-<br>C <sub>6</sub> H <sub>4</sub> CN              | BF <sub>4</sub> <sup>-</sup>  | MeNO <sub>2</sub>      | 892109<br>GAYCEQ   | 113          | LS    | Partial [a16]       | 25 |
| <b>C43AB</b> | 2012 | <i>E</i> -CH=CH-<br>C <sub>6</sub> H <sub>4</sub> NO <sub>2</sub> | BF <sub>4</sub> <sup>-</sup>  | H <sub>2</sub> O       | 892110<br>GAYCIU   | 113          | HS    | Partial [a16]       | 25 |
| A02BA        | 2013 | 4-C <sub>6</sub> H <sub>4</sub> CHO                               | ClO <sub>4</sub> <sup>-</sup> | SF                     | 899972<br>ZERWEA   | 180          | LS    | Yes (285)           | 26 |
| C39AK        | 2013 | <i>E</i> -CH=CH-Ph                                                | BF <sub>4</sub> <sup>-</sup>  | 2PC [a11]              | 811071<br>ITECUG   | 113          | LS    | No (LS up to<br>RT) | 27 |
| C39AK        | 2013 | <i>E</i> -CH=CH-Ph                                                | BF <sub>4</sub> <sup>-</sup>  | 2PC [a11]              | 911443<br>ITECUG01 | 283          | LS    | No (LS up to<br>RT) | 27 |
| C39AG        | 2013 | <i>E</i> -CH=CH-Ph                                                | BF <sub>4</sub> <sup>-</sup>  | ½Et <sub>2</sub> O     | 911442<br>REVCIG   | 113          | LS    | No (LS up to<br>RT) | 27 |
| <b>C39AD</b> | 2013 | <i>E</i> -CH=CH-Ph                                                | BF <sub>4</sub> <sup>-</sup>  | 3MeCN H <sub>2</sub> O | 911441<br>REVCOM   | 113          | HS    | No (HS)             | 27 |
| C39AC        | 2013 | <i>E</i> -CH=CH-Ph                                                | BF <sub>4</sub> <sup>-</sup>  | 4MeNO <sub>2</sub>     | 911440<br>REVCUS   | 243          | HS    | Yes (≈220)<br>[a17] | 27 |
| C39AC        | 2013 | <i>E</i> -CH=CH-Ph                                                | BF <sub>4</sub> <sup>-</sup>  | 4MeNO <sub>2</sub>     | 911439<br>REVCUS01 | 217          | Mixed | Yes (≈220)<br>[a17] | 27 |
| C39AC        | 2013 | <i>E</i> -CH=CH-Ph                                                | BF <sub>4</sub> <sup>-</sup>  | 4MeNO <sub>2</sub>     | 911438<br>REVCUS02 | 192          | LS    | Yes (≈220)<br>[a17] | 27 |
| C39AC        | 2013 | <i>E</i> -CH=CH-Ph                                                | BF <sub>4</sub> <sup>-</sup>  | 4MeNO <sub>2</sub>     | 911437<br>REVCUS03 | 165          | LS    | Yes (≈220)<br>[a17] | 27 |
| C39AC        | 2013 | <i>E</i> -CH=CH-Ph                                                | BF <sub>4</sub> <sup>-</sup>  | 4MeNO <sub>2</sub>     | 911436<br>REVCUS04 | 140          | LS    | Yes (≈220)<br>[a17] | 27 |
| C39AC        | 2013 | <i>E</i> -CH=CH-Ph                                                | BF <sub>4</sub> <sup>-</sup>  | 4MeNO <sub>2</sub>     | 911435<br>REVCUS05 | 115          | LS    | Yes (≈220)<br>[a17] | 27 |
| C39AC        | 2013 | <i>E</i> -CH=CH-Ph                                                | BF <sub>4</sub> <sup>-</sup>  | 4MeNO <sub>2</sub>     | 911434<br>REVCUS06 | 113<br>[a18] | LS    | Yes (≈220)<br>[a17] | 27 |
| <b>C39AE</b> | 2013 | <i>E</i> -CH=CH-Ph                                                | BF <sub>4</sub> <sup>-</sup>  | Me <sub>2</sub> CO     | 911433<br>REVFEF   | 240          | HS    | Yes (≈180)          | 27 |
| C39AE        | 2013 | <i>E</i> -CH=CH-Ph                                                | BF <sub>4</sub> <sup>-</sup>  | Me <sub>2</sub> CO     | 911432<br>REVFEF01 | 190          | HS    | Yes (≈180)          | 27 |
| C39AE        | 2013 | <i>E</i> -CH=CH-Ph                                                | BF <sub>4</sub> <sup>-</sup>  | Me <sub>2</sub> CO     | 911431<br>REVFEF02 | 175          | LS    | Yes (≈180)          | 27 |
| C39AE        | 2013 | <i>E</i> -CH=CH-Ph                                                | BF <sub>4</sub> <sup>-</sup>  | Me <sub>2</sub> CO     | 911430<br>REVFEF03 | 150          | LS    | Yes (≈180)          | 27 |
| C39AE        | 2013 | <i>E</i> -CH=CH-Ph                                                | BF <sub>4</sub> <sup>-</sup>  | Me <sub>2</sub> CO     | 911429<br>REVFEF04 | 113<br>[a18] | HS    | Yes (≈180)          | 27 |
| A09BA        | 2013 | CTPZ [a19]                                                        | ClO <sub>4</sub> <sup>-</sup> | SF                     | -                  | -            | -     | No (HS)             | 28 |

|              |      |              |                               |                    |                     |     |                |                              |    |
|--------------|------|--------------|-------------------------------|--------------------|---------------------|-----|----------------|------------------------------|----|
| C06BA        | 2014 | COOH         | ClO <sub>4</sub> <sup>-</sup> | SF                 | 977453<br>BIYSOT    | 120 | LS             | Yes (380)                    | 29 |
| S02AA        | 2015 | SMe          | BF <sub>4</sub> <sup>-</sup>  | SF                 | 1006370<br>MUCREJ   | 100 | LS             | Yes (268)                    | 30 |
| S02AA        | 2015 | SMe          | BF <sub>4</sub> <sup>-</sup>  | SF                 | 1006371<br>MUCREJ01 | 240 | LS<br>mixed    | Yes (268)                    | 30 |
| <b>S02AA</b> | 2015 | SMe          | BF <sub>4</sub> <sup>-</sup>  | SF                 | 1006372<br>MUCREJ02 | 290 | HS             | Yes (268)                    | 30 |
| X03AA        | 2015 | Br           | BF <sub>4</sub> <sup>-</sup>  | SF                 | 1006373<br>MUCRUZ   | 100 | LS             | Yes (307)                    | 30 |
| X03AA        | 2015 | Br           | BF <sub>4</sub> <sup>-</sup>  | SF                 | 1006374<br>MUCRUZ01 | 250 | LS             | Yes (307)                    | 30 |
| <b>X03AA</b> | 2015 | Br           | BF <sub>4</sub> <sup>-</sup>  | SF                 | 1006375<br>MUCRUZ02 | 350 | HS             | Yes (307)                    | 30 |
| X04AA        | 2015 | I            | BF <sub>4</sub> <sup>-</sup>  | SF                 | 1006376<br>MUCSIO   | 100 | LS             | Yes (332)                    | 30 |
| <b>X04AA</b> | 2015 | I            | BF <sub>4</sub> <sup>-</sup>  | SF                 | 1006377<br>MUCSIO01 | 350 | HS             | Yes (332)                    | 30 |
| <b>C35AC</b> | 2015 | C≡C-Ph       | BF <sub>4</sub> <sup>-</sup>  | MeNO <sub>2</sub>  | 1004453<br>XUKDEO   | 150 | HS             | No (HS)                      | 31 |
| N06AC        | 2015 | N=N-Ph       | BF <sub>4</sub> <sup>-</sup>  | MeNO <sub>2</sub>  | 1004454<br>XUKDIS   | 150 | LS             | No (LS up to RT)             | 31 |
| <b>A04AC</b> | 2015 | Pyrazol-1-yl | BF <sub>4</sub> <sup>-</sup>  | ½MeNO <sub>2</sub> | 1004455<br>XUKDOI   | 100 | mixed<br>[a20] | Partial<br>(65%) (250)       | 31 |
| A04AC        | 2015 | Pyrazol-1-yl | BF <sub>4</sub> <sup>-</sup>  | 2MeNO <sub>2</sub> | 1004456<br>XUKDUE   | 100 | LS             | No (LS up to RT)             | 31 |
| A04AC        | 2015 | Pyrazol-1-yl | BF <sub>4</sub> <sup>-</sup>  | 3MeNO <sub>2</sub> | 1004457<br>XUKFAM   | 100 | LS             | Yes ( <i>T</i> not reported) | 31 |
| A04DC        | 2015 | Pyrazol-1-yl | PF <sub>6</sub> <sup>-</sup>  | 2MeNO <sub>2</sub> | 1004459<br>XUKGEQ   | 105 | LS             | No (LS up to RT) [a21]       | 31 |
| H01AF        | 2015 | H            | BF <sub>4</sub> <sup>-</sup>  | MeOH               | 1004460<br>XUKFIU   | 120 | LS             | No (LS up to RT)             | 31 |
| S01AA        | 2015 | SH           | BF <sub>4</sub> <sup>-</sup>  | SF                 | -                   | -   | -              | Partial<br>(≈275)            | 32 |
| S01BA        | 2015 | SH           | ClO <sub>4</sub> <sup>-</sup> | SF                 | -                   | -   | -              | Yes (≈250)                   | 32 |
| S08AA        | 2015 | S-S [a22]    | BF <sub>4</sub> <sup>-</sup>  | SF                 | -                   | -   | -              | Partial<br>(broad 50%)       | 32 |
| S08BA        | 2015 | S-S [a22]    | ClO <sub>4</sub> <sup>-</sup> | SF                 | -                   | -   | -              | Partial<br>(broad 50%)       | 32 |
| <b>S02BA</b> | 2015 | SMe          | ClO <sub>4</sub> <sup>-</sup> | SF                 | 1060841<br>VULNIB   | 280 | HS             | Yes (≈250)                   | 33 |
| S02BA        | 2015 | SMe          | ClO <sub>4</sub> <sup>-</sup> | SF                 | 1060842<br>VULNIB02 | 253 | HS<br>mixed    | Yes (≈250)                   | 33 |
| S02BA        | 2015 | SMe          | ClO <sub>4</sub> <sup>-</sup> | SF                 | 1060843<br>VULNIB01 | 240 | LS             | Yes (≈250)                   | 33 |
| S02BA        | 2015 | SMe          | ClO <sub>4</sub> <sup>-</sup> | SF                 | 1060844<br>VULNIB03 | 150 | LS             | Yes (≈250)                   | 33 |

|              |      |                           |                               |                                  |                     |     |                     |                            |    |
|--------------|------|---------------------------|-------------------------------|----------------------------------|---------------------|-----|---------------------|----------------------------|----|
| S05AB        | 2015 | SOMe                      | BF <sub>4</sub> <sup>-</sup>  | 2H <sub>2</sub> O                | -                   | -   | -                   | Yes (350)                  | 33 |
| S06AA        | 2015 | SO <sub>2</sub> Me        | BF <sub>4</sub> <sup>-</sup>  | SF                               | -                   | -   | -                   | Yes (> 350)                | 33 |
| C01AC        | 2015 | Me                        | BF <sub>4</sub> <sup>-</sup>  | 4MeNO <sub>2</sub>               | 1006380<br>CUKVUB   | 100 | LS                  | No (LS up to RT)           | 34 |
| C01AA        | 2015 | Me                        | BF <sub>4</sub> <sup>-</sup>  | SF                               | -                   | -   | -                   | Yes (204,209)              | 34 |
| C01BC        | 2015 | Me                        | ClO <sub>4</sub> <sup>-</sup> | 4MeNO <sub>2</sub>               | 1006381<br>CUKWAI   | 150 | LS                  | No (LS up to RT)           | 34 |
| C01BA        | 2015 | Me                        | ClO <sub>4</sub> <sup>-</sup> | SF                               | 1006382<br>CUKWEM   | 100 | HS <sup>[a23]</sup> | Yes (175,193)              | 34 |
| <b>C01BA</b> | 2015 | Me                        | ClO <sub>4</sub> <sup>-</sup> | SF                               | 1006383<br>CUKWEM01 | 240 | HS                  | Yes (175,193)              | 34 |
| <b>C01DA</b> | 2015 | Me                        | PF <sub>6</sub> <sup>-</sup>  | SF                               | 1006384<br>CUKWOW   | 100 | HS                  | No (HS)                    | 34 |
| C01CB        | 2015 | Me                        | TfO <sup>-</sup>              | ½H <sub>2</sub> O                | -                   | -   | -                   | No (LS up to RT)           | 34 |
| <b>N05AB</b> | 2015 | thiomorpholine            | BF <sub>4</sub> <sup>-</sup>  | H <sub>2</sub> O                 | 1058749<br>MUJWOF   | 100 | HS                  | No (HS)                    | 35 |
| <b>N05BB</b> | 2015 | thiomorpholine            | ClO <sub>4</sub> <sup>-</sup> | ½H <sub>2</sub> O                | 1058750<br>MUJWUL   | 100 | HS                  | No (HS)                    | 35 |
| <b>N05CA</b> | 2015 | thiomorpholine            | TfO <sup>-</sup>              | SF                               | 1058751<br>MUJXAS   | 100 | HS                  | No (HS)                    | 35 |
| M02          | 2015 | CONH-POM <sup>[a24]</sup> | -                             | -                                | -                   | -   | -                   | No (HS)                    | 36 |
| <b>O01AF</b> | 2015 | OH                        | BF <sub>4</sub> <sup>-</sup>  | 2MeOH                            | 1006318<br>OZUBAO   | 150 | HS                  | Yes (211) <sup>[a25]</sup> | 37 |
| O01BF        | 2015 | OH                        | ClO <sub>4</sub> <sup>-</sup> | 1.75MeOH<br>0.25H <sub>2</sub> O | 1006319<br>OZUBES   | 150 | HS / mixed          | Yes (207) <sup>[a25]</sup> | 37 |
| <b>O01DF</b> | 2015 | OH                        | PF <sub>6</sub> <sup>-</sup>  | 2MeOH                            | 1006320<br>OZUBIW   | 100 | HS                  | No (HS) <sup>[a25]</sup>   | 37 |
| N03AA        | 2016 | NO <sub>2</sub>           | BF <sub>4</sub> <sup>-</sup>  | SF                               | -                   | -   | -                   | Yes (287)                  | 38 |
| <b>N01AC</b> | 2016 | NH <sub>2</sub>           | BF <sub>4</sub> <sup>-</sup>  | 3MeNO <sub>2</sub>               | 1006314<br>EKAQUE   | 150 | HS                  | No (HS) <sup>[a25]</sup>   | 38 |
| <b>N01BC</b> | 2016 | NH <sub>2</sub>           | ClO <sub>4</sub> <sup>-</sup> | 3MeNO <sub>2</sub>               | 1006315<br>EKAJOR   | 150 | HS                  | No (HS) <sup>[a25]</sup>   | 38 |
| <b>N02AB</b> | 2016 | NMe <sub>2</sub>          | BF <sub>4</sub> <sup>-</sup>  | 0.29H <sub>2</sub> O             | 1006316<br>EKAJUX   | 100 | HS                  | No (HS)                    | 38 |
| <b>N02BB</b> | 2016 | NMe <sub>2</sub>          | ClO <sub>4</sub> <sup>-</sup> | 0.22H <sub>2</sub> O             | 1006317<br>EKAKAE   | 100 | HS                  | No (HS)                    | 38 |
| <b>O02DA</b> | 2016 | OMe                       | PF <sub>6</sub> <sup>-</sup>  | SF                               | 1006321<br>EKAKEI   | 100 | HS                  | No (HS)                    | 38 |
| <b>X01AA</b> | 2016 | F                         | BF <sub>4</sub> <sup>-</sup>  | SF                               | 1006322<br>EKAKIM   | 290 | HS                  | Yes (≈240)                 | 38 |
| X01AA        | 2016 | F                         | BF <sub>4</sub> <sup>-</sup>  | SF                               | 1006323<br>EKAKIM01 | 150 | LS                  | Yes (≈240)                 | 38 |
| X02AA        | 2016 | Cl                        | BF <sub>4</sub> <sup>-</sup>  | SF                               | 1006324<br>EKAKUY   | 100 | LS                  | No (LS up to RT)           | 38 |

|              |      |                                |                               |                         |                     |     |       |                      |    |
|--------------|------|--------------------------------|-------------------------------|-------------------------|---------------------|-----|-------|----------------------|----|
| X02BA        | 2016 | Cl                             | ClO <sub>4</sub> <sup>-</sup> | SF                      | -                   | -   | -     | No (LS up to RT)     | 38 |
| C06AB        | 2016 | COOH                           | BF <sub>4</sub> <sup>-</sup>  | H <sub>2</sub> O        | -                   | -   | -     | No (LS up to RT)     | 38 |
| <b>S03AE</b> | 2016 | SiPr                           | BF <sub>4</sub> <sup>-</sup>  | 0.75Me <sub>2</sub> CO  | 1422786<br>SUXHAW   | 250 | HS    | Yes (141)<br>[a26]   | 39 |
| S03AE        | 2016 | SiPr                           | BF <sub>4</sub> <sup>-</sup>  | 0.75Me <sub>2</sub> CO  | 1422787<br>SUXHAW01 | 100 | LS    | Yes (141)<br>[a26]   | 39 |
| <b>S03AC</b> | 2016 | SiPr                           | BF <sub>4</sub> <sup>-</sup>  | 0.70MeNO <sub>2</sub>   | 1422788<br>XUYXUO   | 250 | HS    | Yes (174)<br>[a26]   | 39 |
| S03AC        | 2016 | SiPr                           | BF <sub>4</sub> <sup>-</sup>  | 0.70MeNO <sub>2</sub>   | 1422789<br>XUYXUO01 | 100 | LS    | Yes (174)<br>[a26]   | 39 |
| <b>S03AB</b> | 2016 | SiPr                           | BF <sub>4</sub> <sup>-</sup>  | H <sub>2</sub> O        | 1422790<br>XUYYEZ   | 250 | HS    | Yes (212)<br>[a26]   | 39 |
| S03AB        | 2016 | SiPr                           | BF <sub>4</sub> <sup>-</sup>  | H <sub>2</sub> O        | 1422791<br>XUYYEZ01 | 150 | LS    | Yes (212)<br>[a26]   | 39 |
| <b>S03AC</b> | 2016 | SiPr                           | BF <sub>4</sub> <sup>-</sup>  | MeNO <sub>2</sub>       | 1422792<br>XUYQOB   | 250 | HS    | Yes (171)<br>[a26]   | 39 |
| S03AC        | 2016 | SiPr                           | BF <sub>4</sub> <sup>-</sup>  | MeNO <sub>2</sub>       | 1422793<br>XUYQOB01 | 100 | LS    | Yes (171)<br>[a26]   | 39 |
| <b>S03AD</b> | 2016 | SiPr                           | BF <sub>4</sub> <sup>-</sup>  | MeCN                    | 1422794<br>XUYRAO   | 250 | HS    | Yes (160)<br>[a26]   | 39 |
| S03AD        | 2016 | SiPr                           | BF <sub>4</sub> <sup>-</sup>  | MeCN                    | 1422795<br>XUYRAO01 | 100 | LS    | Yes (160)<br>[a26]   | 39 |
| <b>S03AD</b> | 2016 | SiPr                           | BF <sub>4</sub> <sup>-</sup>  | MeCN                    | 1422796<br>XUYRAO02 | 165 | HS    | Yes (160)<br>[a26]   | 39 |
| S03AD        | 2016 | SiPr                           | BF <sub>4</sub> <sup>-</sup>  | MeCN                    | 1422797<br>XUYRAO03 | 160 | LS    | Yes (160)<br>[a26]   | 39 |
| <b>S03AA</b> | 2016 | SiPr                           | BF <sub>4</sub> <sup>-</sup>  | SF                      | 1422798<br>XUYRUI   | 300 | HS    | Yes (185)<br>[a26]   | 39 |
| S03AA        | 2016 | SiPr                           | BF <sub>4</sub> <sup>-</sup>  | SF                      | 1422799<br>XUYRUI01 | 100 | LS    | Yes (185)<br>[a26]   | 39 |
| <b>S03AI</b> | 2016 | SiPr                           | BF <sub>4</sub> <sup>-</sup>  | EtCN                    | 1422800<br>SUXHEA01 | 100 | HS    | No (HS) [a26]        | 39 |
| <b>S03AI</b> | 2016 | SiPr                           | BF <sub>4</sub> <sup>-</sup>  | EtCN                    | 1422801<br>SUXHEA   | 290 | HS    | No (HS) [a26]        | 39 |
| C06BE        | 2016 | COOH/COO <sup>-</sup><br>[a27] | ClO <sub>4</sub> <sup>-</sup> | Me <sub>2</sub> CO solv | 1486674<br>EXAZAG   | 120 | LS    | Yes (>300)           | 40 |
| C06BE        | 2016 | COOH/COO <sup>-</sup><br>[a27] | ClO <sub>4</sub> <sup>-</sup> | Me <sub>2</sub> CO solv | 1486674<br>EXAZEK   | 250 | LS    | Yes (>300)           | 40 |
| <b>S03BC</b> | 2017 | SiPr                           | ClO <sub>4</sub> <sup>-</sup> | MeNO <sub>2</sub>       | 1428759<br>GEQHUI01 | 250 | HS    | Partial<br>(102,115) | 41 |
| <b>S03BC</b> | 2017 | SiPr                           | ClO <sub>4</sub> <sup>-</sup> | MeNO <sub>2</sub>       | 1428760<br>GEQHUI02 | 147 | HS    | Partial<br>(102,115) | 41 |
| S03BC        | 2017 | SiPr                           | ClO <sub>4</sub> <sup>-</sup> | MeNO <sub>2</sub>       | 1563026<br>GEQHUI   | 100 | mixed | Partial<br>(102,115) | 41 |
| <b>S03BD</b> | 2017 | SiPr                           | ClO <sub>4</sub> <sup>-</sup> | MeCN                    | 1428761<br>GEQGOB   | 250 | HS    | No (HS)              | 41 |

|              |      |                         |                               |                                    |                     |     |         |                    |    |
|--------------|------|-------------------------|-------------------------------|------------------------------------|---------------------|-----|---------|--------------------|----|
| <b>S03BD</b> | 2017 | SiPr                    | ClO <sub>4</sub> <sup>-</sup> | MeCN                               | 1428762<br>GEQGOB01 | 140 | HS      | No (HS)            | 41 |
| <b>S03BE</b> | 2017 | SiPr                    | ClO <sub>4</sub> <sup>-</sup> | 0.70Me <sub>2</sub> CO             | 1428763<br>GEQGOB02 | 250 | HS      | Partial (<100)     | 41 |
| <b>S03BE</b> | 2017 | SiPr                    | ClO <sub>4</sub> <sup>-</sup> | 0.70Me <sub>2</sub> CO             | 1428764<br>GEQHES   | 147 | HS      | Partial (<100)     | 41 |
| <b>S03BB</b> | 2017 | SiPr                    | ClO <sub>4</sub> <sup>-</sup> | H <sub>2</sub> O                   | 1563027<br>GEQJAJ   | 250 | HS      | Yes (173)          | 41 |
| S03BB        | 2017 | SiPr                    | ClO <sub>4</sub> <sup>-</sup> | H <sub>2</sub> O                   | 1563028<br>GEQJAJ01 | 100 | LS      | Yes (173)          | 41 |
| <b>S03BA</b> | 2017 | SiPr                    | ClO <sub>4</sub> <sup>-</sup> | SF                                 | 1563029<br>GEQJIY   | 250 | HS      | Not tested [a28]   | 41 |
| S03BA        | 2017 | SiPr                    | ClO <sub>4</sub> <sup>-</sup> | SF                                 | 1563030<br>GEQJIY01 | 118 | LS      | Not tested [a28]   | 41 |
| S03AB        | 2017 | SiPr                    | BF <sub>4</sub> <sup>-</sup>  | H <sub>2</sub> O                   | 1564665<br>ZUYYEZ02 | 30  | LS      | Yes (LIESST)       | 41 |
| S03AB        | 2017 | SiPr                    | BF <sub>4</sub> <sup>-</sup>  | H <sub>2</sub> O                   | 1564666<br>ZUYYEZ03 | 30  | HS [a2] | Yes (LIESST)       | 41 |
| S03AD        | 2017 | SiPr                    | BF <sub>4</sub> <sup>-</sup>  | MeCN                               | 1564667<br>ZUYRAO04 | 85  | LS      | Yes (LIESST)       | 41 |
| S03AD        | 2017 | SiPr                    | BF <sub>4</sub> <sup>-</sup>  | MeCN                               | 1564668<br>ZUYRAO06 | 85  | HS [a2] | Yes (LIESST)       | 41 |
| S03AD        | 2017 | SiPr                    | BF <sub>4</sub> <sup>-</sup>  | MeCN                               | 1564669<br>ZUYRAO05 | 15  | HS [a2] | Yes (LIESST)       | 41 |
| S03AC        | 2017 | SiPr                    | BF <sub>4</sub> <sup>-</sup>  | MeNO <sub>2</sub>                  | 1564670<br>ZUYQOB03 | 100 | LS      | Yes (LIESST)       | 41 |
| S03AC        | 2017 | SiPr                    | BF <sub>4</sub> <sup>-</sup>  | MeNO <sub>2</sub>                  | 1564671<br>ZUYQOB02 | 15  | LS      | Yes (LIESST)       | 41 |
| S03AC        | 2017 | SiPr                    | BF <sub>4</sub> <sup>-</sup>  | MeNO <sub>2</sub>                  | 1564672<br>ZUYQOB04 | 15  | HS [a2] | Yes (LIESST)       | 41 |
| <b>M01AH</b> | 2017 | C≡C-Pt(Terpy)           | BF <sub>4</sub> <sup>-</sup>  | 3.5CH <sub>2</sub> Cl <sub>2</sub> | 1510868<br>JAMLOB   | 180 | HS      | No (HS)            | 42 |
| M01AH        | 2017 | C≡C-Pt(Terpy)           | BF <sub>4</sub> <sup>-</sup>  | 10CH <sub>2</sub> Cl <sub>2</sub>  | 1510869<br>JAMBUX   | 180 | LS      | Yes (268)          | 42 |
| <b>C08BA</b> | 2017 | COOMe                   | ClO <sub>4</sub> <sup>-</sup> | SF                                 | 1522449<br>KAQYUZ   | 115 | HS      | No (HS)            | 43 |
| C11BD        | 2017 | CONHtriolH <sub>3</sub> | ClO <sub>4</sub> <sup>-</sup> | MeCN                               | 1522450<br>KAQZAG   | 140 | LS      | Yes (>400)         | 43 |
| C49AB        | 2017 | chain pyrene [a29]      | BF <sub>4</sub> <sup>-</sup>  | H <sub>2</sub> O                   | -                   | -   | -       | Yes (363)          | 44 |
| C48AB        | 2017 | chain pyrene [a30]      | BF <sub>4</sub> <sup>-</sup>  | H <sub>2</sub> O                   | -                   | -   | -       | Yes (213)          | 44 |
| <b>N04AE</b> | 2018 | NHCOMe                  | BF <sub>4</sub> <sup>-</sup>  | Me <sub>2</sub> CO                 | 1569542<br>VIFXAM   | 240 | HS      | Partial (50%, 140) | 45 |
| N04AE        | 2018 | NHCOMe                  | BF <sub>4</sub> <sup>-</sup>  | Me <sub>2</sub> CO                 | 1569543<br>VIFXEQ   | 130 | mixed   | Partial (50%, 140) | 45 |
| <b>N04BE</b> | 2018 | NHCOMe                  | ClO <sub>4</sub> <sup>-</sup> | Me <sub>2</sub> CO                 | 1569544<br>VIFXIU   | 170 | HS      | No (HS)            | 45 |

|              |      |                                                                      |                               |                                 |                     |     |               |                              |    |
|--------------|------|----------------------------------------------------------------------|-------------------------------|---------------------------------|---------------------|-----|---------------|------------------------------|----|
| N04BE        | 2018 | NHCOMe                                                               | ClO <sub>4</sub> <sup>-</sup> | Me <sub>2</sub> CO              | 1569545<br>VIFXIU01 | 120 | HS            | No (HS)                      | 45 |
| <b>C06AA</b> | 2018 | COOH                                                                 | BF <sub>4</sub> <sup>-</sup>  | SF                              | 1856804<br>YILFAD   | 350 | HS            | Yes (345)                    | 46 |
| C06AA        | 2018 | COOH                                                                 | BF <sub>4</sub> <sup>-</sup>  | SF                              | 1856805<br>YILHAF   | 120 | LS            | Yes (345)                    | 46 |
| C06EE        | 2018 | COOH                                                                 | AsF <sub>6</sub> <sup>-</sup> | 2Me <sub>2</sub> CO             | 1856806<br>YILFEH   | 120 | LS            | Yes (>250)                   | 46 |
| C06EE        | 2018 | COOH                                                                 | AsF <sub>6</sub> <sup>-</sup> | Me <sub>2</sub> CO              | 1856807<br>YILFIL   | 300 | LS<br>(mixed) | Yes (>250)                   | 46 |
| C06FE        | 2018 | COOH                                                                 | SbF <sub>6</sub> <sup>-</sup> | Me <sub>2</sub> CO              | 1856808<br>YILFOR   | 300 | LS<br>(mixed) | Yes (>250)                   | 46 |
| C06FE        | 2018 | COOH                                                                 | SbF <sub>6</sub> <sup>-</sup> | 2Me <sub>2</sub> CO             | 1856811<br>YILGAE   | 120 | LS            | Yes (>250)                   | 46 |
| C06CE        | 2018 | COOH                                                                 | TfO <sup>-</sup>              | Me <sub>2</sub> CO              | 1856809<br>YILFUX   | 300 | LS            | Yes (>350)                   | 46 |
| C06CE        | 2018 | COOH                                                                 | TfO <sup>-</sup>              | 0.5Me <sub>2</sub> CO           | 1856812<br>YILGEI   | 120 | LS            | Yes (>350)                   | 46 |
| <b>C06BA</b> | 2018 | COOH                                                                 | ClO <sub>4</sub> <sup>-</sup> | SF                              | 1856814<br>BIYSOT01 | 400 | HS            | Yes (380)                    | 46 |
| C10BE        | 2018 | COOEt                                                                | ClO <sub>4</sub> <sup>-</sup> | 1.5Me <sub>2</sub> CO           | 1856810<br>YILGUY   | 120 | LS            | Yes (>300)                   | 46 |
| C10BE        | 2018 | COOEt                                                                | ClO <sub>4</sub> <sup>-</sup> | 0.75Me <sub>2</sub> CO          | 1856813<br>YILGAE   | 300 | LS            | Yes (>300)                   | 46 |
| C03AC        | 2018 | CH <sub>2</sub> Br                                                   | BF <sub>4</sub> <sup>-</sup>  | 4MeNO <sub>2</sub>              | 1854820<br>WIJTOB   | 150 | LS            | Yes (≈340)                   | 47 |
| C03AA        | 2018 | CH <sub>2</sub> Br                                                   | BF <sub>4</sub> <sup>-</sup>  | SF                              | 1854822<br>WIJVAP   | 200 | LS            | Yes (325)                    | 47 |
| C50AB        | 2018 | chain pyrene<br>[a31]                                                | BF <sub>4</sub> <sup>-</sup>  | H <sub>2</sub> O                | -                   | -   | -             | Yes (≈450)                   | 48 |
| C51AA        | 2018 | chain pyrene<br>[a32]                                                | BF <sub>4</sub> <sup>-</sup>  | SF                              | -                   | -   | -             | No (HS)                      | 48 |
| A10AH        | 2018 | chain fullerene<br>[a33]                                             | BF <sub>4</sub> <sup>-</sup>  | CH <sub>2</sub> Cl <sub>2</sub> | -                   | -   | -             | Partial<br>(≈208)            | 48 |
| C17AA        | 2018 | COOC <sub>6</sub> H <sub>4</sub> OMe                                 | BF <sub>4</sub> <sup>-</sup>  | SF                              | 1844100<br>LIPFOI   | 120 | LS            | Yes (>350)                   | 49 |
| C16AA        | 2018 | COOC <sub>6</sub> H <sub>4</sub> OH                                  | BF <sub>4</sub> <sup>-</sup>  | SF                              | 1844101<br>LIPFUO   | 120 | LS            | Yes (>350)                   | 49 |
| C20AB        | 2018 | COOC <sub>6</sub> H <sub>4</sub><br>OC <sub>6</sub> H <sub>13</sub>  | BF <sub>4</sub> <sup>-</sup>  | H <sub>2</sub> O                | 1844102<br>LIPGAV   | 120 | LS            | No (LS up to<br>350 K) [a34] | 49 |
| C21A         | 2018 | COOC <sub>6</sub> H <sub>4</sub><br>OC <sub>12</sub> H <sub>25</sub> | BF <sub>4</sub> <sup>-</sup>  | -                               | -                   | -   | -             | Partial (50%,<br>212) [a34]  | 49 |
| C22AD        | 2018 | COOC <sub>6</sub> H <sub>4</sub><br>OC <sub>14</sub> H <sub>29</sub> | BF <sub>4</sub> <sup>-</sup>  | 2MeCN                           | 1844103<br>LIPGEZ   | 100 | LS            | Partial<10%<br>(325) [a34]   | 49 |
| C23AB        | 2018 | COOC <sub>6</sub> H <sub>4</sub><br>OC <sub>16</sub> H <sub>33</sub> | BF <sub>4</sub> <sup>-</sup>  | H <sub>2</sub> O                | 1854267<br>LIPJIG   | 120 | LS            | Yes (>350)<br>[a34]          | 49 |
| C24A         | 2018 | COOC <sub>6</sub> H <sub>4</sub><br>OC <sub>18</sub> H <sub>37</sub> | BF <sub>4</sub> <sup>-</sup>  | -                               | -                   | -   | -             | Yes (>350)<br>[a34]          | 49 |



|              |      |                                                                        |                               |                                             |                          |     |                |                            |    |
|--------------|------|------------------------------------------------------------------------|-------------------------------|---------------------------------------------|--------------------------|-----|----------------|----------------------------|----|
| C28A         | 2018 | COOC <sub>12</sub> H <sub>25</sub>                                     | BF <sub>4</sub> <sup>-</sup>  | -                                           | -                        | -   | -              | Yes (>350)<br>[a34]        | 49 |
| C29A         | 2018 | COOC <sub>14</sub> H <sub>29</sub>                                     | BF <sub>4</sub> <sup>-</sup>  | -                                           | -                        | -   | -              | Yes (340)<br>[a34]         | 49 |
| C30A         | 2018 | COOC <sub>16</sub> H <sub>33</sub>                                     | BF <sub>4</sub> <sup>-</sup>  | -                                           | -                        | -   | -              | Yes (>350)<br>[a34]        | 49 |
| C31A         | 2018 | COOC <sub>18</sub> H <sub>37</sub>                                     | BF <sub>4</sub> <sup>-</sup>  | -                                           | -                        | -   | -              | Yes (>350)<br>[a34]        | 49 |
| C14AC        | 2019 | CSNH <sub>2</sub>                                                      | BF <sub>4</sub> <sup>-</sup>  | 2MeNO <sub>2</sub>                          | 1860676<br>HIKPEZ01      | 100 | LS             | No (LS up to<br>350)       | 50 |
| C14AC        | 2019 | CSNH <sub>2</sub>                                                      | BF <sub>4</sub> <sup>-</sup>  | 2MeNO <sub>2</sub>                          | 1860677<br>HIKPEZ        | 290 | LS             | No (LS up to<br>RT)        | 50 |
| C14BA        | 2019 | CSNH <sub>2</sub>                                                      | ClO <sub>4</sub> <sup>-</sup> | SF                                          | -                        | -   | -              | No (LS up to<br>350)       | 50 |
| C15AC        | 2019 | CSNHMe                                                                 | BF <sub>4</sub> <sup>-</sup>  | MeNO <sub>2</sub>                           | 1860678<br>HIKPID        | 100 | LS             | Yes (≈330)                 | 50 |
| C15AC        | 2019 | CSNHMe                                                                 | BF <sub>4</sub> <sup>-</sup>  | MeNO <sub>2</sub>                           | 1860679<br>HIKPID02      | 290 | LS             | Yes (≈330)                 | 50 |
| C15AC        | 2019 | CSNHMe                                                                 | BF <sub>4</sub> <sup>-</sup>  | MeNO <sub>2</sub>                           | 1860680<br>HIKPID01      | 330 | LS<br>(mixed)  | Yes (≈330)                 | 50 |
| C15BA        | 2019 | CSNHMe                                                                 | ClO <sub>4</sub> <sup>-</sup> | SF                                          | 1860681<br>HIKRAX        | 102 | LS             | Yes (≈325)                 | 50 |
| C15BA        | 2019 | CSNHMe                                                                 | ClO <sub>4</sub> <sup>-</sup> | SF                                          | 1860682<br>HIKRAX01      | 290 | LS             | Yes (≈325)                 | 50 |
| <b>C15BA</b> | 2019 | CSNHMe                                                                 | ClO <sub>4</sub> <sup>-</sup> | SF                                          | 1860683<br>HIKRAX02      | 370 | HS             | Yes (≈325)                 | 50 |
| <b>C10BD</b> | 2019 | COOEt                                                                  | ClO <sub>4</sub> <sup>-</sup> | MeCN                                        | 1589139<br>WIVMEW        | 253 | HS             | Yes (233)                  | 51 |
| C37CD        | 2019 | C≡C-<br>anthracene [a35]                                               | TfO <sup>-</sup>              | 7MeCN                                       | 1862242<br>VOBCUN        | 100 | mixed<br>[a35] | Partial (50%,<br>250)      | 52 |
| C38CC        | 2019 | C≡C-chain [a36]                                                        | TfO <sup>-</sup>              | 18MeNO <sub>2</sub><br>9H <sub>2</sub> O    | 1862243<br>VIZSAB        | 180 | HS             | No (HS)                    | 52 |
| C19AC        | 2019 | COOC <sub>6</sub> H <sub>3</sub><br>(OMe) <sub>2</sub>                 | BF <sub>4</sub> <sup>-</sup>  | 2MeNO <sub>2</sub>                          | 1884423<br>HOSZEX        | 120 | LS [a37]       | Yes (>350)                 | 53 |
| <b>C19AC</b> | 2019 | COOC <sub>6</sub> H <sub>3</sub><br>(OMe) <sub>2</sub>                 | BF <sub>4</sub> <sup>-</sup>  | 2MeNO <sub>2</sub>                          | 1884424<br>HOSZEX01      | 120 | HS [a37]       | No (HS)                    | 53 |
| C18AA        | 2019 | COOC <sub>6</sub> H <sub>3</sub><br>(OH) <sub>2</sub>                  | BF <sub>4</sub> <sup>-</sup>  | SF                                          | 1884425<br>HOSZOH        | 120 | LS             | Unknown                    | 53 |
| C25AD        | 2019 | COOCH <sub>2</sub> Ph                                                  | BF <sub>4</sub> <sup>-</sup>  | 1.5MeCN                                     | 1884426<br>HOSZUN        | 150 | LS             | Yes (370)                  | 53 |
| C26AD        | 2019 | COOCH <sub>2</sub><br>C <sub>6</sub> H <sub>4</sub> OMe                | BF <sub>4</sub> <sup>-</sup>  | 1.5MeCN                                     | 1884427<br>HOTBAW        | 150 | LS             | Not tested                 | 53 |
| C27AE        | 2019 | COOCH <sub>2</sub><br>C <sub>6</sub> H <sub>3</sub> (OMe) <sub>2</sub> | BF <sub>4</sub> <sup>-</sup>  | xMe <sub>2</sub> CO<br>0.25H <sub>2</sub> O | preliminary<br>structure | 120 | LS             | Not tested                 | 53 |
| C07BB        | 2019 | 3-COOH                                                                 | ClO <sub>4</sub> <sup>-</sup> | 0.5H <sub>2</sub> O<br>0.5EtOH              | 1910175<br>FOGLAR        | 122 | LS             | No (LS up to<br>400) [a38] | 54 |
| C09BA        | 2019 | 3-COOMe                                                                | ClO <sub>4</sub> <sup>-</sup> | SF                                          | 1910176<br>FOGLEV        | 120 | LS             | Not tested                 | 54 |

|              |      |               |                               |                       |                     |       |                |                      |    |
|--------------|------|---------------|-------------------------------|-----------------------|---------------------|-------|----------------|----------------------|----|
| C05AD        | 2020 | CN            | BF <sub>4</sub> <sup>-</sup>  | MeCN                  | 1961768<br>BADLIF   | 293   | LS             | Yes (243)<br>[a39]   | 55 |
| C05BA        | 2020 | CN            | ClO <sub>4</sub> <sup>-</sup> | SF                    | 2010806<br>BADLLOL  | 293   | LS             | Yes (241)<br>[a40]   | 55 |
| <b>A05AA</b> | 2020 | Imidazol-1-yl | BF <sub>4</sub> <sup>-</sup>  | SF                    | 1997944<br>XUYTAP   | 120   | HS             | No (HS)              | 56 |
| <b>A05BA</b> | 2020 | Imidazol-1-yl | ClO <sub>4</sub> <sup>-</sup> | SF                    | 1997945<br>XUYTET   | 120   | HS             | No (HS)              | 56 |
| S03A [41]    | 2020 | SiPr          | BF <sub>4</sub> <sup>-</sup>  | [a41]                 | [a41]               | [a41] | [a41]          | [a41]                | 57 |
| S03A [41]    | 2020 | SiPr          | ClO <sub>4</sub> <sup>-</sup> | [a41]                 | [a41]               | [a41] | [a41]          | [a41]                | 57 |
| S04AC        | 2021 | <i>S</i> tBu  | BF <sub>4</sub> <sup>-</sup>  | 2.3MeNO <sub>2</sub>  | 1991053<br>UKEKUT   | 120   | LS             | Yes [a42]            | 58 |
| S04AC        | 2021 | <i>S</i> tBu  | BF <sub>4</sub> <sup>-</sup>  | 2.3MeNO <sub>2</sub>  | 1991052<br>UKEKON   | 250   | LS /<br>mixed  | Yes [a42]            | 58 |
| S04AC        | 2021 | <i>S</i> tBu  | BF <sub>4</sub> <sup>-</sup>  | 0.75MeNO <sub>2</sub> | 1991051<br>UKEKIH   | 120   | Mixed          | Partial 50%<br>(172) | 58 |
| <b>S04AC</b> | 2021 | <i>S</i> tBu  | BF <sub>4</sub> <sup>-</sup>  | 0.75MeNO <sub>2</sub> | 1991050<br>UKEKED   | 220   | HS             | Partial 50%<br>(172) | 58 |
| S04AD        | 2021 | <i>S</i> tBu  | BF <sub>4</sub> <sup>-</sup>  | MeCN                  | 1991049<br>UKEKAZ   | 120   | LS             | Yes (276)            | 58 |
| S04AD        | 2021 | <i>S</i> tBu  | BF <sub>4</sub> <sup>-</sup>  | MeCN                  | 1991048<br>UKEJUS   | 240   | Mixed          | Yes (276)            | 58 |
| S04AD        | 2021 | <i>S</i> tBu  | BF <sub>4</sub> <sup>-</sup>  | MeCN                  | 1991047<br>UKEJOM   | 250   | Mixed          | Yes (276)            | 58 |
| <b>S04AD</b> | 2021 | <i>S</i> tBu  | BF <sub>4</sub> <sup>-</sup>  | MeCN                  | 1991046<br>UKEJIG   | 260   | HS [a43]       | Yes (276)            | 58 |
| S04AE        | 2021 | <i>S</i> tBu  | BF <sub>4</sub> <sup>-</sup>  | 1.6Me <sub>2</sub> CO | 1991045<br>UKEJEC   | 120   | Mixed<br>[a44] | Partial              | 58 |
| S04BC        | 2021 | <i>S</i> tBu  | ClO <sub>4</sub> <sup>-</sup> | MeNO <sub>2</sub>     | 1991044<br>UKESUB01 | 120   | LS             | Yes (244)            | 58 |
| S04BC        | 2021 | <i>S</i> tBu  | ClO <sub>4</sub> <sup>-</sup> | MeNO <sub>2</sub>     | 1991043<br>UKEHUQ   | 250   | Mixed          | Yes (244)            | 58 |
| <b>S04BC</b> | 2021 | <i>S</i> tBu  | ClO <sub>4</sub> <sup>-</sup> | MeNO <sub>2</sub>     | 1991042<br>UKESUB   | 350   | HS             | Yes (244)            | 58 |
| S04BD        | 2021 | <i>S</i> tBu  | ClO <sub>4</sub> <sup>-</sup> | MeCN                  | 1991041<br>UKERIO05 | 120   | LS             | Yes (253)            | 58 |
| S04BD        | 2021 | <i>S</i> tBu  | ClO <sub>4</sub> <sup>-</sup> | MeCN                  | 1991040<br>UKERIO04 | 180   | LS             | Yes (253)            | 58 |
| S04BD        | 2021 | <i>S</i> tBu  | ClO <sub>4</sub> <sup>-</sup> | MeCN                  | 1991039<br>UKERIO03 | 230   | LS             | Yes (253)            | 58 |
| S04BD        | 2021 | <i>S</i> tBu  | ClO <sub>4</sub> <sup>-</sup> | MeCN                  | 1991038<br>UKERIO02 | 250   | Mixed          | Yes (253)            | 58 |
| S04BD        | 2021 | <i>S</i> tBu  | ClO <sub>4</sub> <sup>-</sup> | MeCN                  | 1991037<br>UKERIO01 | 290   | Mixed          | Yes (253)            | 58 |
| <b>S04BD</b> | 2021 | <i>S</i> tBu  | ClO <sub>4</sub> <sup>-</sup> | MeCN                  | 1991036<br>UKERIO   | 330   | HS             | Yes (253)            | 58 |

|       |      |                                                                                                                                |                               |                                              |                     |     |       |                          |    |
|-------|------|--------------------------------------------------------------------------------------------------------------------------------|-------------------------------|----------------------------------------------|---------------------|-----|-------|--------------------------|----|
| S04BE | 2021 | <i>S</i> tBu                                                                                                                   | ClO <sub>4</sub> <sup>-</sup> | 0.5Me <sub>2</sub> CO<br>0.2H <sub>2</sub> O | 1991035<br>UKERЕК   | 120 | LS    | Partial <sup>[a45]</sup> | 58 |
| S04BE | 2021 | <i>S</i> tBu                                                                                                                   | ClO <sub>4</sub> <sup>-</sup> | 0.5Me <sub>2</sub> CO<br>0.2H <sub>2</sub> O | 1991034<br>UKERAG   | 250 | LS    | Partial <sup>[a45]</sup> | 58 |
| S04BB | 2021 | <i>S</i> tBu                                                                                                                   | ClO <sub>4</sub> <sup>-</sup> | SF                                           | 1991033<br>UKEQOT01 | 120 | LS    | Not tested               | 58 |
| S04BB | 2021 | <i>S</i> tBu                                                                                                                   | ClO <sub>4</sub> <sup>-</sup> | SF                                           | 1991032<br>UKEQOT   | 250 | LS    | Not tested               | 58 |
| C52BA | 2021 | CH <sub>2</sub> OC(O)(CH <sub>2</sub> ) <sub>4</sub> (C <sub>3</sub> H <sub>5</sub> S <sub>2</sub> )                           | ClO <sub>4</sub> <sup>-</sup> | SF                                           | -                   | -   | -     | Partial <sup>[a46]</sup> | 59 |
| C53BA | 2021 | CONH(CH <sub>2</sub> ) <sub>2</sub><br>OC(O)(CH <sub>2</sub> ) <sub>4</sub><br>(C <sub>3</sub> H <sub>5</sub> S <sub>2</sub> ) | ClO <sub>4</sub> <sup>-</sup> | SF                                           | -                   | -   | -     | Partial <sup>[a46]</sup> | 59 |
| C54BA | 2021 | COO(CH <sub>2</sub> ) <sub>2</sub> O<br>C(O)(CH <sub>2</sub> ) <sub>4</sub><br>(C <sub>3</sub> H <sub>5</sub> S <sub>2</sub> ) | ClO <sub>4</sub> <sup>-</sup> | SF                                           | -                   | -   | -     | Partial <sup>[a46]</sup> | 59 |
| S07BA | 2021 | S(CH <sub>2</sub> ) <sub>2</sub> NH<br>C(O)(CH <sub>2</sub> ) <sub>4</sub><br>(C <sub>3</sub> H <sub>5</sub> S <sub>2</sub> )  | ClO <sub>4</sub> <sup>-</sup> | SF                                           | -                   | -   | -     | HS                       | 59 |
| C12BD | 2021 | CONHCH <sub>2</sub><br>COOH                                                                                                    | ClO <sub>4</sub> <sup>-</sup> | MeCN                                         | 2074280<br>ITIDOH   | 120 | LS    | Partial <sup>[a47]</sup> | 59 |
| C12BD | 2021 | CONHCH <sub>2</sub><br>COOH                                                                                                    | ClO <sub>4</sub> <sup>-</sup> | MeCN                                         | 2074281<br>ITIDOH01 | 330 | mixed | Partial <sup>[a47]</sup> | 59 |
| C13BD | 2021 | CONH(CH <sub>2</sub> ) <sub>2</sub><br>COOH                                                                                    | ClO <sub>4</sub> <sup>-</sup> | 2MeCN                                        | 2074282<br>ITIFAV01 | 120 | LS    | Partial <sup>[a47]</sup> | 59 |
| C13BD | 2021 | CONH(CH <sub>2</sub> ) <sub>2</sub><br>COOH                                                                                    | ClO <sub>4</sub> <sup>-</sup> | 2MeCN                                        | 2074283<br>ITIFAV   | 290 | mixed | Partial <sup>[a47]</sup> | 59 |

<sup>[a1]</sup> personal consideration: suspected solvent loss during magnetic measurements, the  $T_{1/2}$  is the same as the SF complex

<sup>[a2]</sup> light induced from the LS structure at the same temperature

<sup>[a3]</sup> mixed = two independent cations in the unit cell, one HS and the other LS

<sup>[a4]</sup> the complex is protonated, [Fe(L)<sub>2</sub>H](ClO<sub>4</sub>)<sub>3</sub>·MeOH, L = bpp-4-py, the proton links together two consecutive pyridyl substituents forming a 1D chain

<sup>[a5]</sup> mixed-anion species [Fe(L)<sub>2</sub>](ClO<sub>4</sub>)<sub>x</sub>(BF<sub>4</sub>)<sub>2-x</sub> are also reported in the same paper

<sup>[a6]</sup> two different polymorphs that crystallize together, separated by hand at the microscope; small fraction of residual HS species

<sup>[a7]</sup> the  $T_{1/2}$  moves to higher temperature upon increasing the number of cooling-heating cycles probably due to the loss of the MeCN solvated molecules

<sup>[a8]</sup> co-crystals with variable percentage of [Ru(terpy)<sub>2</sub>](BF<sub>4</sub>)<sub>2</sub> are also reported

<sup>[a9]</sup> two different polymorphs with different conformation of the CH<sub>2</sub>SCN groups

<sup>[a10]</sup> the complex is protonated, [Fe(L)<sub>2</sub>H](BF<sub>4</sub>)<sub>3</sub>·MeCN·H<sub>2</sub>O, L = bpp-3-py; the spin transition at 300 K is irreversible due to loss of co-crystallized solvent; once desolvated, the  $T_{1/2}$  moves to 240 (↑) and 231 (↓) K

<sup>[a11]</sup> propylene carbonate; the solvent-free *Z* isomer was irradiated to generate the solvent-free *E* form, which shows partial spin conversion

<sup>[a12]</sup> TTF = *E*-CH=CH-tetrathiofulvalene

<sup>[a13]</sup> cation with overall +3 charge with mono-electronic oxidation localized over the TTF moieties

<sup>[a14]</sup> CH<sub>2</sub>OC(O)CH<sub>2</sub>CH<sub>2</sub>CH<sub>2</sub>pyrene

<sup>[a15]</sup> the structures and the  $T_{1/2}$  refer to three different polymorphs that interconvert each other upon heating and cooling

<sup>[a16]</sup> desolvation

<sup>[a17]</sup> the compound quickly loses the co-crystallized nitromethane molecules; only partial spin conversion is present due to the small fraction of intact solvated species, while the desolvated sample is always HS;

- [a18] rapid freezing at 60 K min<sup>-1</sup>
- [a19] CTPZ = cyclotriphosphazene
- [a20] two independent cations, one LS and one HS
- [a21] the sample loses nitromethane and adsorbs two molecules of water once exposed to air, this new solvated derivative is HS at RT
- [a22] disulfide bridges between two bpp ligands, the compounds are supposed to be tetranuclear species
- [a23] the crystal undergoes rupture while slowly cooling to 100 K, rapid freezing blocked the complex in its HS state also at 100 K
- [a24] POM = polyoxometalate MnMo<sub>6</sub>O<sub>24</sub>, it works also as counteranion
- [a25] magnetic measurements were performed on the unsolvated samples
- [a26] they all show similar  $T_{1/2}$  around 170-180 K, similar to the SF compound, once the samples are annealed at 350 K with consequent solvent removal
- [a27] The compound is formulated as {[Fe<sup>III</sup><sub>3</sub>(μ<sub>3</sub>-O)(H<sub>2</sub>O)<sub>3</sub>][Fe<sup>II</sup>(bppCOOH)(bppCOO)]<sub>6</sub>}(ClO<sub>4</sub>)<sub>13</sub>·6Me<sub>2</sub>CO·solvate, where the deprotonated COO<sup>-</sup> substituents of the six Fe-bpp complexes coordinate the Fe<sup>III</sup><sub>3</sub>O cluster
- [a28] single crystal obtained by annealing of the acetone solvate directly on the diffractometer
- [a29] chain pyrene = COO(CH<sub>2</sub>)<sub>4</sub>pyrene
- [a30] chain pyrene = CH<sub>2</sub>OC(O)(CH<sub>2</sub>)<sub>3</sub>pyrene
- [a31] chain pyrene = COOCH<sub>2</sub>pyrene
- [a32] chain pyrene = CH<sub>2</sub>OC(O)CH<sub>2</sub>pyrene
- [a33] chain fullerene = C<sub>6</sub>H<sub>4</sub>CH<sub>2</sub>OC(O)C(fullerene)COOEt
- [a34] all samples employed for solid state magnetic measurements contain a variable degree of water, some samples may lose water during the measurements
- [a35] tetranuclear species with bridging bpp ligands connected by -C≡C-anthracene-C≡C-; at 100 K, two iron centres are HS and two are LS
- [a36] hexanuclear species with bridging bpp ligands connected by -C≡C-anthracene-C≡C-anthraquinone-C≡C-anthracene-C≡C-
- [a37] two different polymorphs
- [a38] co-crystallized solvent is lost while heating, causing an irreversible spin transition
- [a39] the sample gradually loses the acetonitrile molecule forming a SF phase, which is the one SCO active
- [a40] the sample employed for magnetic measurements did not belong to the same crystallographic phase of the single crystal analyzed for X-ray diffraction
- [a41] continuation of the studies reported in *Chem. Eur. J.*, **2016**, 22, 1789–1799 and *Chem. Commun.*, **2017**, 53, 13268–13271; the solvents tested (MeCN, H<sub>2</sub>O, MeNO<sub>2</sub> and Me<sub>2</sub>CO) are the same; the crystal structures were collected at several temperatures upon cooling or heating; CCDC: 1976565–1975626.
- [a42] irreversible spin transition at 320 K due to solvent loss.
- [a43] the crystal undergoes abrupt spin transition at 255 K, while the powder sample shows a more gradual process with  $T_{1/2}$  = 276 K
- [a44] 5 independent cations in the unit cell, only one over five is HS
- [a45] the magnetic measurements show the beginning of SCO above 300 K
- [a46] the magnetic susceptibility starts to increase from 1-1.5 cm<sup>3</sup> K mol<sup>-1</sup> at 150-200 K to about 3 cm<sup>3</sup> K mol<sup>-1</sup> at 350 K
- [a47] mostly LS, the magnetic susceptibility starts to increase from 0.5 cm<sup>3</sup> K mol<sup>-1</sup> at 250 K to about 1.5 cm<sup>3</sup> K mol<sup>-1</sup> at 350 K

**Table S3** The 28 structural parameters considered for building the PCA and PLS models.

| Distances |    |
|-----------|----|
| N1–Fe     | D1 |
| N2–Fe     | D2 |
| N3–Fe     | D3 |
| N4–Fe     | D4 |
| N5–Fe     | D5 |
| N6–Fe     | D6 |

| Angles   |     |
|----------|-----|
| N1–Fe–N2 | A1  |
| N1–Fe–N3 | A2  |
| N1–Fe–N4 | A3  |
| N1–Fe–N5 | A4  |
| N1–Fe–N6 | A5  |
| N2–Fe–N3 | A6  |
| N2–Fe–N4 | A7  |
| N2–Fe–N5 | A8  |
| N2–Fe–N6 | A9  |
| N3–Fe–N4 | A10 |
| N3–Fe–N5 | A11 |
| N3–Fe–N6 | A12 |
| N4–Fe–N5 | A13 |
| N4–Fe–N6 | A14 |
| N5–Fe–N6 | A15 |

| Torsional Angles        |      |
|-------------------------|------|
| pyridineN1 ∠ pyrazoleN2 | T1   |
| pyridineN1 ∠ pyrazoleN3 | T2   |
| pyrazoleN2 ∠ pyrazoleN3 | T3   |
| pyridineN4 ∠ pyrazoleN5 | T4   |
| pyridineN4 ∠ pyrazoleN6 | T5   |
| pyrazoleN5 ∠ pyrazoleN6 | T6   |
| ligandN123 ∠ ligandN456 | T_LL |

## Chemometrics methods

### Principal Component Analysis (PCA)

Multivariate data analysis through PCA<sup>60</sup> was applied to highlight data structure and the presence of outliers, and check variability sources within the data. PCA extracts the prevailing and systematic information of the variables that describe the system by rotating the original space in a space constructed so that each new variable, called principal component (PC), is orthogonal to the others and that each new variable explains the maximum possible fraction of variance of the data not yet explained by the previous PCs. The PCs are linear combinations of the original variables, the first PC is in the direction of maximum variability of the data, the second is uncorrelated with the first (the two axes are orthogonal) and explains the maximum residual variance fraction, and so on. At maximum, as many components as the rank of the data set can be calculated, leading to exhausting the variance (information) present in the data.<sup>61,62</sup>

From a mathematical point of view, PCA can be written as a matrix decomposition with general formula:  $X = T P^T + E$ , where  $X$  is the initial dataset,  $T$  is the matrix holding the score vectors, which are the samples coordinates in the PCs space with one score vector per each PC;  $P$  is the matrix holding the loadings vectors, which represent the weight with which each original variable contributes to the PCs. Finally,  $E$  is the matrix holding the residual variance, i.e. the part of  $X$  that is not modelled by PCA, like noise.<sup>61</sup>

The aspects to consider when building a PCA model are the number of PCs, the preprocessing to apply prior to PCA, how to deal with possible outliers and how to graphically interpret the results and extracting useful information, making use of Scores, Loadings and Residuals plots.

Preprocessing are a series of mathematical operations and functions that can be applied to the raw data to remove unwanted sources of variability, stabilize the model or help the interpretations.<sup>63</sup> Mean centring removes an offset from the data and allows focusing on the differences with respect to the average. Scaling is usually applied to make comparable variables of different nature, and scale. When the data are formed by different group of variables, each group having a different meaning and measure scale, it is useful Block-scaling to unit block variance, this scaling allows each block to contribute the same to the PCA model. It can be applied in combination with intra-block autoscaling, i.e. namely block autoscaling, which is the scaling we adopted in this work.<sup>64</sup>

The choice of the number of PCs is another important step to build the model. PCs are correlated to the variance explained by the model, so by taking a low number of PCs you can under-fitting your data leading in discarding some sources of variability and “lose” interesting trend/correlation. On the other hand, taking too many PCs you can over-fit your data including also unwanted information, i.e.

unsystematic sources of variability.<sup>60</sup> For exploratory analysis, a few components are generally sufficient, and you can still decide on the basis of the analysis of the scores how many PCs show systematic trends.<sup>65,66</sup>

The Scores plot is a graphical representation of the samples in space of the PCs, describing how samples are positioned according to what the components explain. Here differences, similarities, clustering or groups of samples can be observed. Since the distances between scores reflect the differences of samples in the raw data, a scores plot can be read as follows: samples corresponding to points which are located very close share similar behaviour, while points opposite with respect to the origin show opposite behaviour, and points not close, nor opposite, indicate sample which have different properties/behaviour. The Loadings plot is the representation of the weights of the original variables in the space of the PCs. As for the scores, difference and similarities among variables can be identified. In particular, variables corresponding to points which are located very close are directly correlated, while points opposite with respect to the origin indicate inverse correlation. Scores and Loadings plots for the same PCs must always be seen together and interpreted jointly. If a grouping or a trend among samples exists, the corresponding loading plot explains the reason, i.e. which are the variables mainly responsible for the observed trend, depicted by the fact that they lie along the same direction in the loadings plot. Variables whose projection on the axes is very close to the origin have negligible significance.

Finally, it must be remembered that, while the direction taken by PC1 axis is unique, the sign is arbitrary, meaning that in two different PCA's of the same samples set, we can see samples in specular position in scores plot, but their relative positioning will not change (thus no inconsistency has to be considered in this case).

### **Partial Least Squares regression (PLS)**

Partial Least Squares Regression (PLS) is one of the most known and applied methods for multivariate calibration.<sup>67</sup> It shares similarity with Multilinear regression (MLR) but overcomes the collinearity problem by operating a projection of the descriptors  $\mathbf{X}$  matrix and the response  $\mathbf{y}$  vector (PLS-1), or responses  $\mathbf{Y}$  matrix (PLS-2) into the latent variables (LVs) space. While the other discussed projection method, PCA, operates on the  $\mathbf{X}$  matrix determining the principal components based on the variance of  $\mathbf{X}$  itself, PLS iteratively models both  $\mathbf{X}$  and  $\mathbf{Y}$  to explain as much as possible covariance of both blocks simultaneously and thus maximise the covariance between  $\mathbf{X}$  and  $\mathbf{Y}$ . This is done by looking for a least squares solution component-wise between  $\mathbf{t}$ 's (X-scores) and  $\mathbf{u}$ 's (Y-scores), which can be schematically summarized as repeating iteratively until convergence:  $\mathbf{T} = \mathbf{XW}^T$ ;  $\mathbf{W} = \mathbf{U}^T \mathbf{X}$ , where the matrix  $\mathbf{W}$  holds the PLS weights, coefficients which ensures linear

combinations of variables in  $X$  for each latent variable that maximize the covariance between  $T$  and  $U$ .

Two main algorithms can be used for the calculation of the PLS models: the NIPALS algorithm and the SIMPLS algorithm, converging to the same solution.

A PLS model consists of:

- a PCA-like model for  $X$ :  $X = T P^T + E$ ;
- a PCA-like model for  $Y$ :  $Y = U Q^T + F$ ;
- the weights matrix  $W$ ;
- the pseudo regressions coefficients  $B$  that directly relates  $X$  with  $Y$  and can be obtained by post-processing the PLS model output:  $B = W (P^T W)^{-1} Q^T$ .

**Classification (PLS-DA).** Classification problems arise every time the target of a study is the establishment whether a set of samples can be classified or not in two or more classes based on a series of measured responses. The PLS-Discriminant Analysis (PLS-DA) approach uses PLS-2 regression where the  $Y$  block is formed of dummy variables encoding the class membership for each sample, i.e. for each category/class a binary  $y$  vector of 1's (sample is a member) and 0's (not a member) is the dependent variable ( $y$ ).<sup>68</sup> The model is identical to a PLS regression model, but a criterion to assign a sample to one of the defined classes has to be decided when using PLS-DA, since the predicted values  $Y_{pred}$  are continuous and not discrete (0 or 1) as the nominal  $Y$ . In some implementations of PLS-DA, a fixed boundary limit of 0.5 is assumed as the limit for class membership assignment. In other implementations, the threshold is optimized, as the limit giving the lowest misclassification error in cross validation. In this thesis we adopted a true discriminant rule by assigning each sample to the class for which the predicted  $y$  value is the highest. Moreover, projecting to latent variables makes obtaining a graphical representation and interpretation of the results in a similar way to PCA and PLS models possible. In the present work, PLS-DA models have been used to build prediction models of iron(II) complexes.

**Validation.** Multivariate Model in general requires to be tested through a process called validation, to evaluate the internal consistency and the actual predictive capabilities. These can be done with a cross-validation, in which one or a subset of samples is left out from the data set and the model is calibrated on the remaining samples. In this way, the values of the samples that are left out are predicted and so the errors are estimated. The process is repeated with another subset of samples, until every sample or subset of samples has been left out once. All the residual errors are combined in the RMSECV (Root Mean Square Error in Cross-Validation). Typical Cross Validation procedures exclude one sample at the time (LOO, Leave One Out), random or customised block of samples, whose choice depends on data and objectives. In this work we used a cross-validation scheme leaving



more samples out called venetian blind, which after defining the number of splits,  $ns$ , (a user choice parameter, the lower the more samples are left out and the more severe is the validation) keeps out at each iteration every  $ns$  samples, e.g. first iteration: left out samples are 1: $ns$ :end sample; second iteration: 2: $ns$ :end sample, etc...

Validation can also occur with external validation (test set), building a completely independent set of samples with respect to the ones used for calibrating the model and for which the  $y$  properties are known, and evaluating the model prediction ability on them. Generally, cross validation is used to find the optimal values of the models adjustable (or tuneable) parameters, such as the number of components in PLS and PLS-DA, while external validation allows assessing the predictive capability of a model.

### **Software**

*MATLAB* Version R2019© The MathWorks, Inc., Natick, Massachusetts, USA, has been used as main platform for managing datasets, preprocessing and multivariate data analysis algorithms.

*PLS\_toolbox* Version 8.9.1, Eigenvector Research, Inc., 3905 West Eaglerock Drive, Wenatchee, WA 98801, USA, has been used for PCA and PLS analysis of iron and cobalt complexes.

For PLS-DA analysis, a set of routines developed in MATLAB by Prof. Federico Marini (Roma, La Sapienza) and Prof. Marina Cocchi were used. Preprocessing was applied with an in-house developed routine, written in MATLAB, by Prof. Marina Cocchi.

## Experimental Section

**General information.** Solvents – acetonitrile (MeCN) and diethyl ether (Et<sub>2</sub>O) – and chemicals were of reagent grade and used as received. Ligand bpp-Me was synthesised as reported in the literature.<sup>34</sup> The elemental analyses were carried out with the Thermo Scientific Flash 2000 CHNS analyser. The infrared (IR) spectra were recorded in the Attenuated Total Reflectance (ATR) mode with the spectrophotometer Jasco FTIR-4700LE and a resolution of 2 cm<sup>-1</sup>. Bands were assigned with the relative intensity: s (strong), m (medium), w (weak), vw (very weak), b (broad).

**Synthesis of [Fe(bpp-Me)<sub>2</sub>](BF<sub>4</sub>)<sub>2</sub> (C01AA).** Solid Fe(BF<sub>4</sub>)<sub>2</sub>·6H<sub>2</sub>O (37.08 mg, 0.1066 mmol) was added to a colourless solution of bpp-Me (51.45 mg, 0.2284 mmol) in MeCN (3 mL) causing the immediate colour change to yellow-orange upon formation of the desired complex. After stirring for 30 minutes, the solution was filtered to eliminate undissolved materials and subjected to vapour diffusion with Et<sub>2</sub>O (6 mL). Diffusion was complete in about one week and the X-ray quality yellow crystalline product was collected by filtration, washed with Et<sub>2</sub>O:MeCN (2:1 v/v) and dried under vacuum. Yield: 54.07 mg (74.6%). Anal (%) calcd for C<sub>24</sub>H<sub>22</sub>B<sub>2</sub>F<sub>8</sub>FeN<sub>10</sub> (679.96): C 42.39, H 3.26, N 20.60. Found: C 42.71, H 3.23, N 21.03. FT-IR in ATR (KBr, cm<sup>-1</sup>): 1632m + 1579m + 1523m + 1402m (νC=C, νC=N), 1034s (νBF<sub>4</sub><sup>-</sup>).

**X-ray Crystal Structure Determinations.** Crystal data and collection details for **C01AA** are reported in Table S3. The diffraction experiments were carried out on a Bruker APEX II diffractometer equipped with a PHOTON100 detector and using Mo-Kα radiation at 100(2) and 293(2) K. Data were corrected for Lorentz polarization and absorption effects (empirical absorption correction SADABS).<sup>69</sup> Structure was solved by direct methods and refined by full-matrix least-squares based on all data using *F*<sup>2</sup>.<sup>70</sup> All non-hydrogen atoms were refined with anisotropic displacement parameters. The H atoms bonded to C-atoms were fixed at calculated positions and refined isotropically using a riding model. The program Mercury 4.3.1 was used for graphics.<sup>71</sup> CCDC 2191546 and 2191547 contain the supplementary crystallographic data for **C01AA** at 100 and 293 K, respectively.

These data can be obtained free of charge via <https://www.ccdc.cam.ac.uk/structures/>, or from the Cambridge Crystallographic Data Centre, 12 Union Road, Cambridge CB2 1EZ, UK; fax: (+44) 1223-336-033, or e-mail: [deposit@ccdc.cam.ac.uk](mailto:deposit@ccdc.cam.ac.uk).

**Table S4** Crystallographic and refinement data for **C01AA** at 100 and 293 K.

|                                                                           | <b>C01AA (100 K)</b>                                                            | <b>C01AA (293 K)</b>                                                            |
|---------------------------------------------------------------------------|---------------------------------------------------------------------------------|---------------------------------------------------------------------------------|
| Formula                                                                   | C <sub>24</sub> H <sub>22</sub> B <sub>2</sub> F <sub>8</sub> FeN <sub>10</sub> | C <sub>24</sub> H <sub>22</sub> B <sub>2</sub> F <sub>8</sub> FeN <sub>10</sub> |
| <i>M</i>                                                                  | 679.98                                                                          | 679.98                                                                          |
| Temperature / K                                                           | 100(2)                                                                          | 293(2)                                                                          |
| radiation $\lambda$ / Å                                                   | Mo-K $\alpha$ , 0.71073                                                         | Mo-K $\alpha$ , 0.71073                                                         |
| Crystal system                                                            | monoclinic                                                                      | monoclinic                                                                      |
| Space group                                                               | <i>P</i> 2 <sub>1</sub> / <i>n</i> (n. 14)                                      | <i>P</i> 2 <sub>1</sub> / <i>n</i> (n. 14)                                      |
| <i>a</i> / Å                                                              | 8.4217(4)                                                                       | 8.5193(9)                                                                       |
| <i>b</i> / Å                                                              | 8.6528(4)                                                                       | 8.6032(9)                                                                       |
| <i>c</i> / Å                                                              | 37.3757(17)                                                                     | 39.031(4)                                                                       |
| $\beta$ / °                                                               | 93.077(2)                                                                       | 91.125(4)                                                                       |
| <i>V</i> / Å <sup>3</sup>                                                 | 2719.7(2)                                                                       | 2860.2(5)                                                                       |
| <i>Z</i>                                                                  | 4                                                                               | 4                                                                               |
| <i>D<sub>c</sub></i> / g cm <sup>-3</sup>                                 | 1.661                                                                           | 1.579                                                                           |
| $\mu$ / mm <sup>-1</sup>                                                  | 0.647                                                                           | 0.615                                                                           |
| F(000)                                                                    | 1376                                                                            | 1376                                                                            |
| Colour, habit                                                             | orange, prism                                                                   | orange, prism                                                                   |
| Crystal size / mm                                                         | 0.21 × 0.16 × 0.14                                                              | 0.21 × 0.16 × 0.14                                                              |
| $\theta$ limits / °                                                       | 2.183 – 26.998                                                                  | 2.087 – 25.049                                                                  |
| Measured reflns                                                           | 50953                                                                           | 49965                                                                           |
| Independent reflns                                                        | 5912                                                                            | 5061                                                                            |
| Reflns with $I > 2\sigma(I)$                                              | 5087                                                                            | 3709                                                                            |
| <i>R</i> <sub>int</sub>                                                   | 0.0867                                                                          | 0.1226                                                                          |
| <i>R</i> <sub>1</sub> , <i>wR</i> <sub>2</sub> [ $I > 2\sigma(I)$ ]       | 0.0467, 0.0933                                                                  | 0.0762, 0.1933                                                                  |
| <i>R</i> <sub>1</sub> , <i>wR</i> <sub>2</sub> [all data]                 | 0.0575, 0.0960                                                                  | 0.1031, 0.2062                                                                  |
| Goodness of fit on <i>F</i> <sup>2</sup>                                  | 1.165                                                                           | 1.073                                                                           |
| Parameters, restraints                                                    | 408, 0                                                                          | 408, 0                                                                          |
| ( $\Delta\sigma$ ) <sub>max</sub>                                         | 0.002                                                                           | 0.001                                                                           |
| $\Delta\rho_{\text{max}}$ , $\Delta\rho_{\text{min}}$ / e Å <sup>-3</sup> | 0.536, -0.547                                                                   | 0.754, -0.646                                                                   |

**Table S5** Coordination bond distances (Å) and angles (°) of **C01AA** at 100 and 293 K.

| parameter               | 100 K      | 293 K      |
|-------------------------|------------|------------|
| Fe1–N1                  | 1.966(2)   | 2.177(4)   |
| Fe1–N3 (py)             | 1.895(2)   | 2.118(4)   |
| Fe1–N5                  | 1.977(2)   | 2.174(4)   |
| Fe1–N6                  | 1.974(2)   | 2.212(5)   |
| Fe1–N8 (py)             | 1.893(2)   | 2.123(4)   |
| Fe1–N10                 | 1.961(2)   | 2.150(4)   |
| N1–Fe1–N3               | 80.10(9)   | 73.60(15)  |
| N3–Fe1–N5               | 79.79(9)   | 73.44(14)  |
| N1–Fe1–N5 ( $\psi_1$ )  | 159.89(8)  | 146.64(14) |
| N6–Fe1–N8               | 80.05(9)   | 72.39(16)  |
| N8–Fe1–N10              | 79.86(9)   | 74.00(15)  |
| N6–Fe1–N10 ( $\psi_2$ ) | 159.80(8)  | 146.34(16) |
| N1–Fe1–N6               | 91.84(9)   | 94.49(17)  |
| N1–Fe1–N8               | 101.11(9)  | 110.89(15) |
| N1–Fe1–N10              | 89.90(9)   | 99.12(16)  |
| N3–Fe1–N6               | 100.85(9)  | 93.05(16)  |
| N3–Fe1–N8 ( $\phi$ )    | 178.48(10) | 164.85(15) |
| N3–Fe1–N10              | 99.27(9)   | 120.28(15) |
| N5–Fe1–N6               | 92.21(9)   | 92.20(17)  |
| N5–Fe1–N8               | 98.99(9)   | 102.29(15) |
| N5–Fe1–N10              | 93.04(9)   | 93.04(16)  |
| $\theta$ <sup>[a]</sup> | 89.08      | 89.64      |
| $\Sigma$ <sup>[b]</sup> | 73.4       | 134.4      |
| $\Theta$ <sup>[c]</sup> | 295        | 467        |

<sup>[a]</sup> dihedral angle between the least squares planes described by the 16 C/N atoms of the bpp-Me ligands

<sup>[b]</sup>  $\Sigma = \sum_{i=1}^{12} |90 - \beta_i|$ , where  $\beta_i$  are the 12 *cis*-N–Fe–N angles about the iron atom

<sup>[c]</sup>  $\Theta = \sum_{j=1}^{24} |60 - \gamma_j|$ , where  $\gamma_j$  are the 24 unique N–Fe–N angles measured on the projection of two triangular faces of the octahedron along their common pseudo-3-fold axis

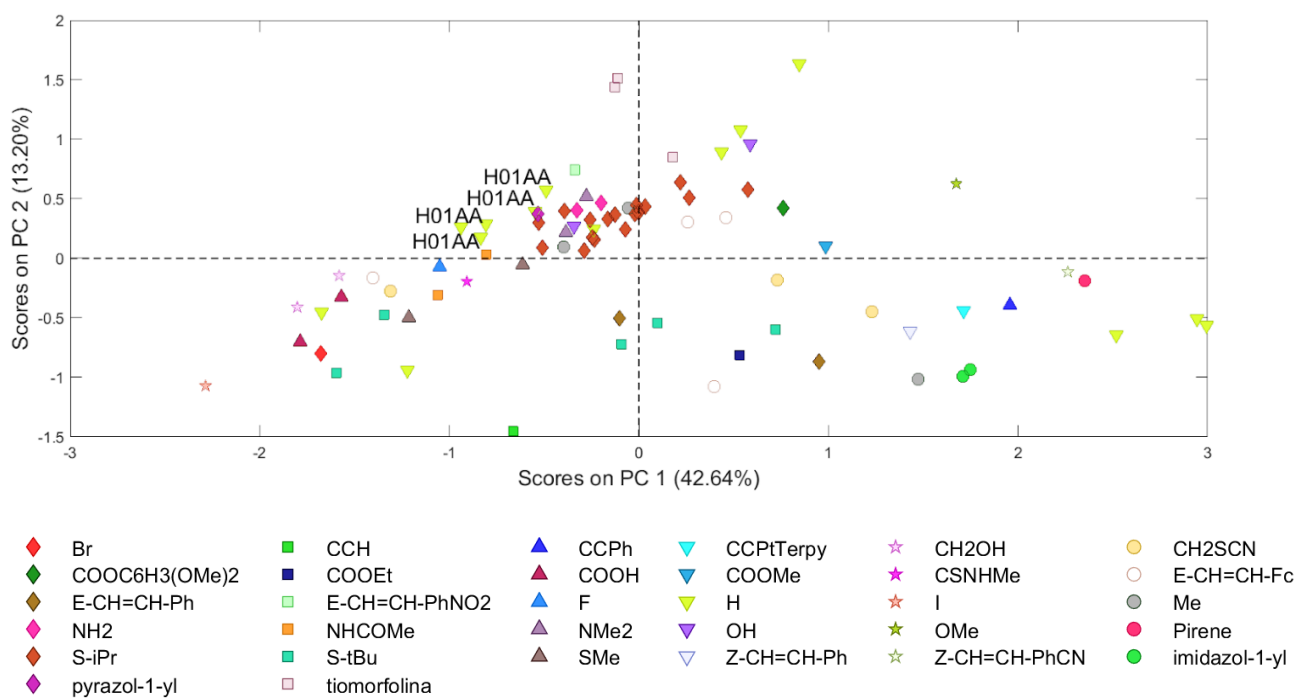

**Fig. S2** PC1 vs PC2 Scores plot for the PCA model constructed including all the variables D, A and T for the selected 83 HS complexes; the symbol legend corresponds to the R groups, and the labels are added only for complexes directly discussed in the text.

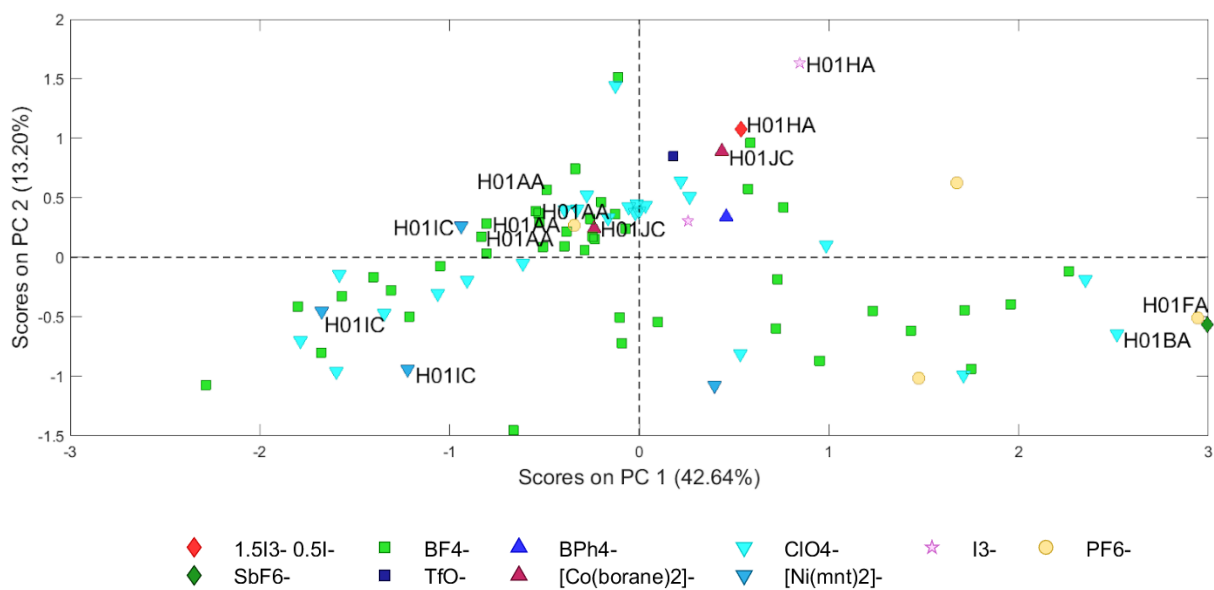

**Fig. S3** PC1 vs PC2 Scores plot for the PCA model constructed including all the variables D, A and T for the selected 83 HS complexes; the symbol legend corresponds to the anions  $X^-$ , and the labels are added only for complexes directly discussed in the text.

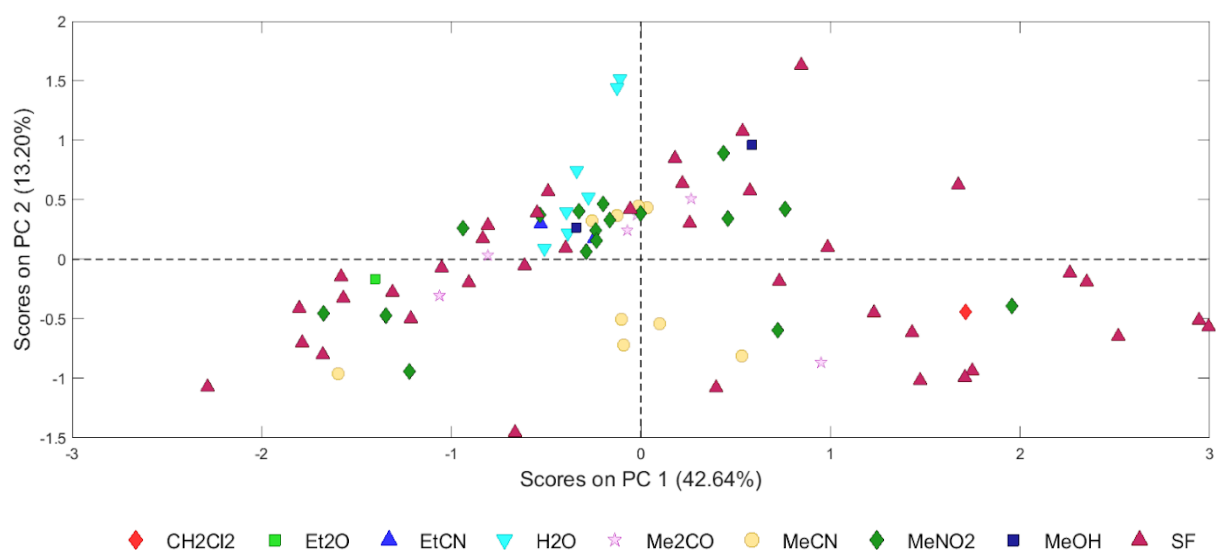

**Fig. S4** PC1 vs PC2 Scores plot for the PCA model constructed including all the variables D, A and T for the selected 83 HS complexes; the symbol legend corresponds to the co-crystallized solvents.

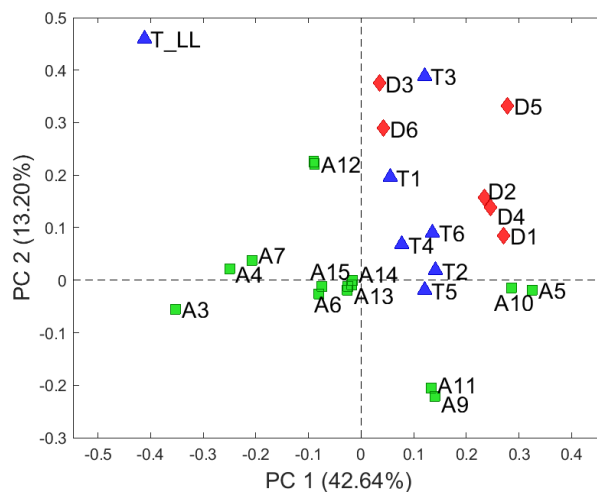

**Fig. S5** PC1 vs. PC2 Loadings plot for the PCA model constructed including all the variables D, A and T for the selected 83 HS complexes; distances D are coloured in red, angles A in green and torsional angles T in blue.

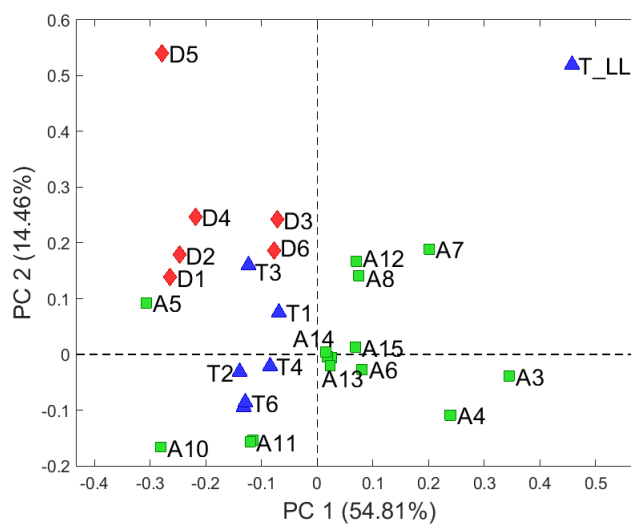

**Fig. S6** PC1 vs. PC2 Loadings plot for the PCA model constructed including all the variables D, A and T for the selected 39 solvent-free (SF) HS complexes; distances D are coloured in red, angles A in green and torsional angles T in blue.



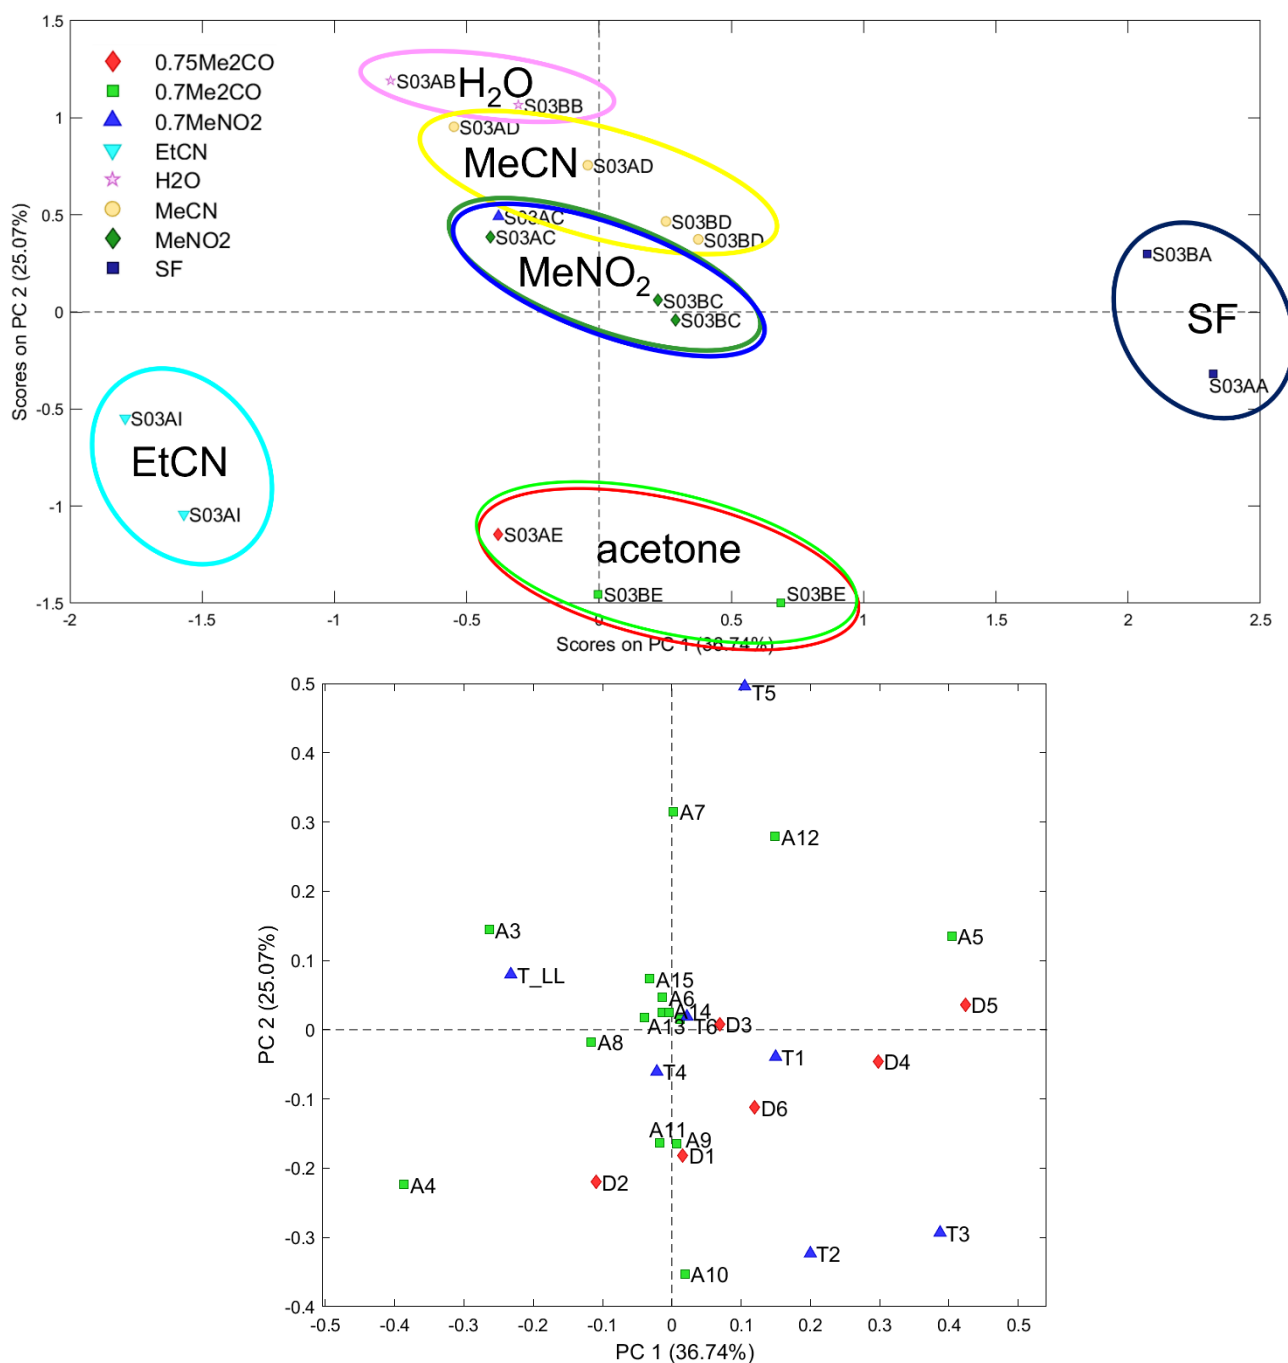

**Fig. S7** PC1 vs PC2 Scores (top panel) and Loadings (bottom panel) plots for the PCA model constructed including all the variables D, A and T for the 17 HS complexes with R = S-*i*Pr. In the Scores plot the symbol legend corresponds to the co-crystallized solvents, and coloured circles were used to highlight complexes with the same solvent; in the Loadings plot distances D are coloured in red, angles A in green and torsional angles T in blue.

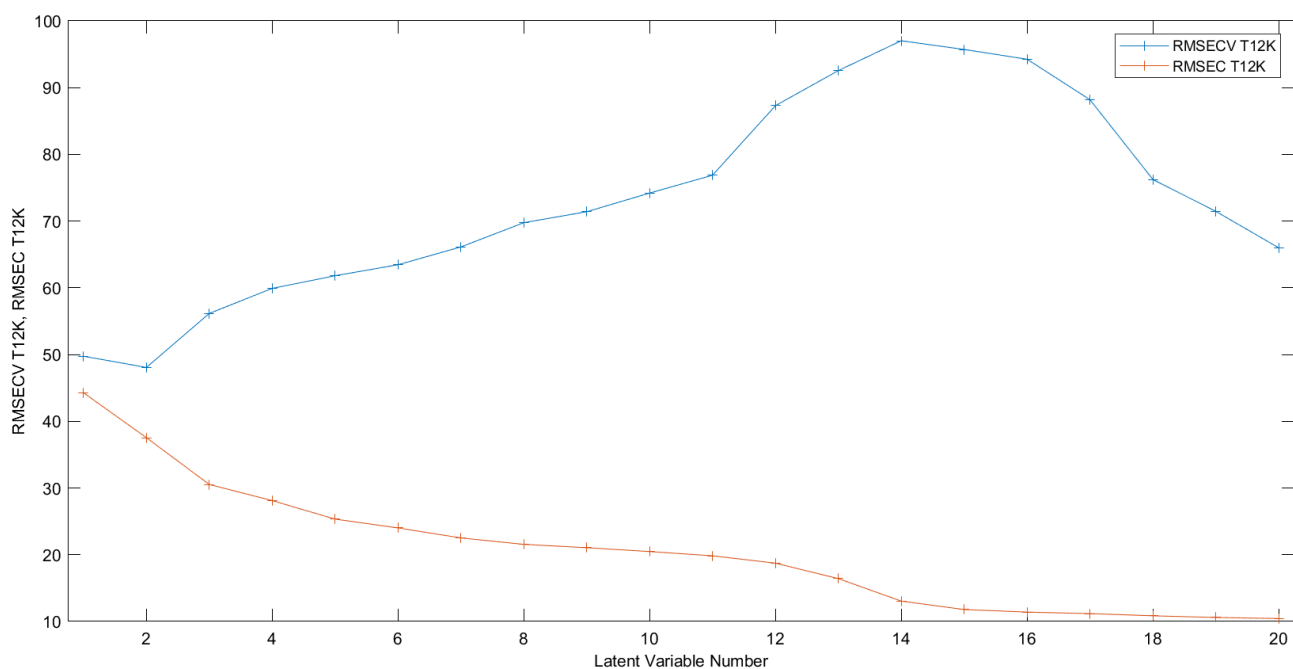

**Fig. S8** Root Mean Square Errors in Calibration (RMSEC, red line) and in Cross-Validation (RMSECV, blue line) vs Latent Variable Number Plot.

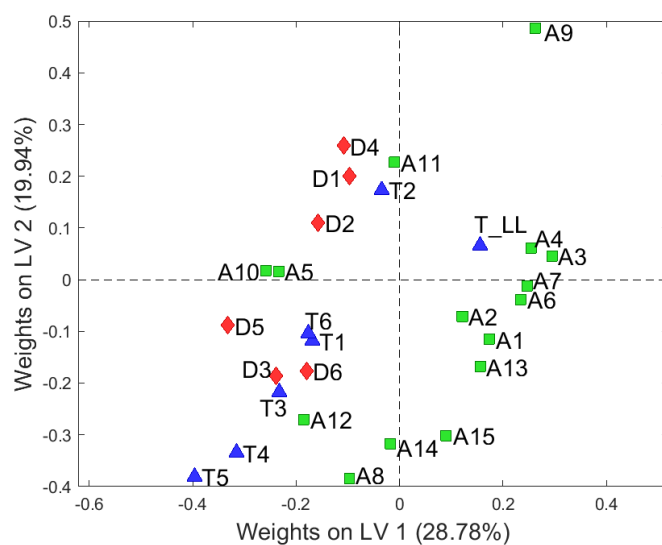

**Fig. S9** PLS regression model based on 34 structures of iron(II) complexes: weights plot LV1 vs LV2, distances D are red diamonds, angles A are green squares, torsion angles T are blue triangles.

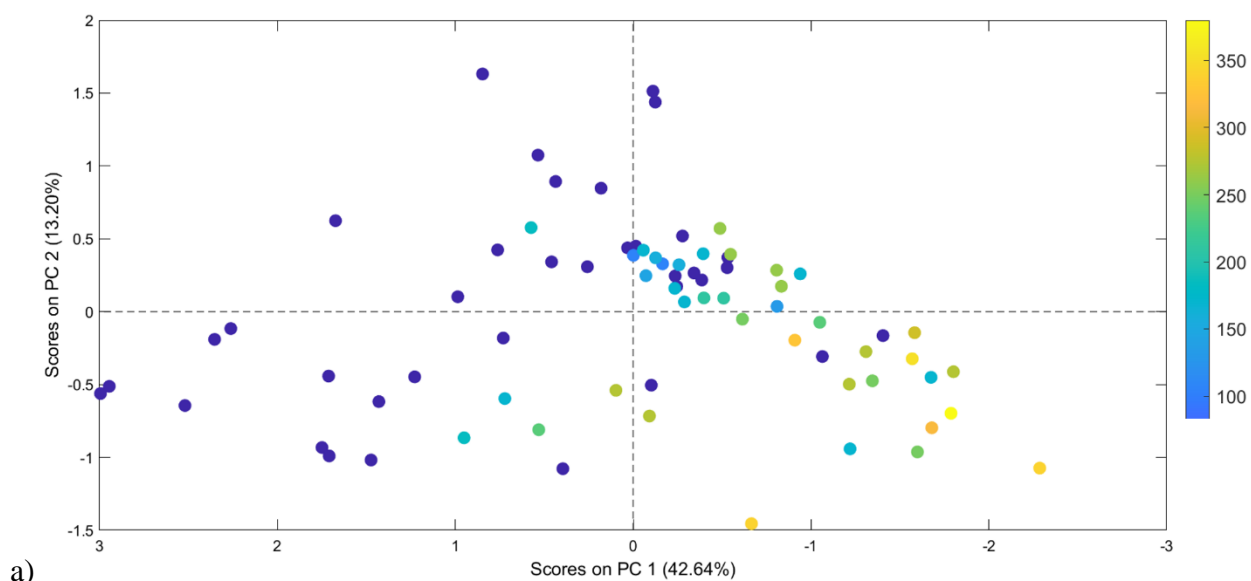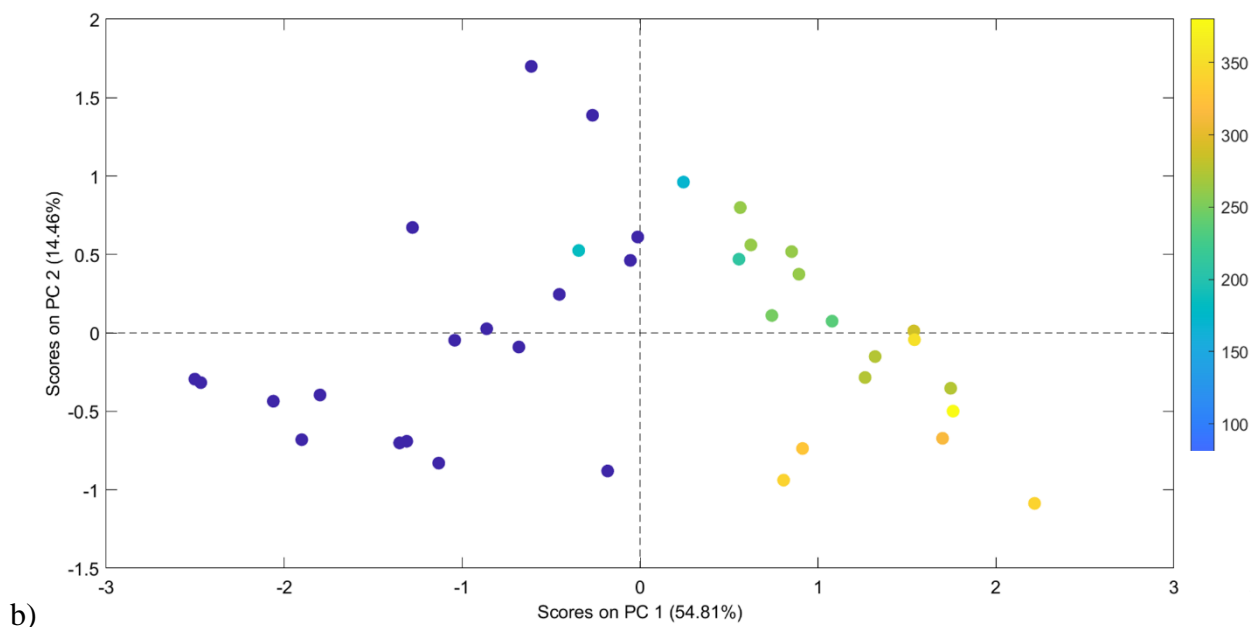

**Fig. S10**  $T_{1/2}$  values distribution in the PC1 vs PC2 Scores plots across the PCA models constructed with either a) the 83 HS complexes or b) the 39 SF HS derivatives. Dark blue circles represent the HS-blocked complexes.

## References

- 1 J. M. Holland, C. A. Kilner, M. Thornton-Pett, M. A. Halcrow, J. A. McAllister and Z. Lu, *Chem. Commun.*, 2001, 577–578.
- 2 J. M. Holland, J. A. McAllister, C. A. Kilner, M. Thornton-Pett, A. J. Bridgeman and M. A. Halcrow, *J. Chem. Soc., Dalton Trans.*, 2002, 548–554.
- 3 V. A. Money, I. Radosavljevic Evans, M. A. Halcrow, A. E. Goeta and J. A. K. Howard, *Chem. Commun.*, 2003, 158–159.
- 4 V. A. Money, J. Elhaik, M. A. Halcrow and J. A. K. Howard, *Dalton Trans.*, 2004, 1516–1518.
- 5 J. Elhaik, D. J. Evans, C. A. Kilner and M. A. Halcrow, *Dalton Trans.*, 2005, 1693–1700.
- 6 J. Elhaik, C. A. Kilner and M. A. Halcrow, *Dalton Trans.*, 2006, 823–830.
- 7 C. Carbonera, J. Sánchez Costa, V. A. Money, J. Elhaik, J. A. K. Howard, M. A. Halcrow and J.-F. Létard, *Dalton Trans.*, 2006, 3058–3066.
- 8 C. Rajadurai, F. Schramm, S. Brink, O. Fuhr, M. Ghafari, R. Kruk and M. Ruben, *Inorg. Chem.*, 2006, **45**, 10019–10021.
- 9 C. Carbonera, Colin. A. Kilner, J.-F. Létard and M. A. Halcrow, *Dalton Trans.*, 2007, 1284–1292.
- 10 C. Rajadurai, Z. Qu, O. Fuhr, B. Gopalan, R. Kruk, M. Ghafari and M. Ruben, *Dalton Trans.*, 2007, 3531.
- 11 M. Nihei, L. Han and H. Oshio, *J. Am. Chem. Soc.*, 2007, **129**, 5312–5313.
- 12 M. Nihei, T. Maeshima, Y. Kose and H. Oshio, *Polyhedron*, 2007, **26**, 1993–1996.
- 13 N. T. Madhu, I. Salitros, F. Schramm, S. Klyatskaya, O. Fuhr and M. Ruben, *C. R. Chimie*, 2008, **11**, 1166–1174.
- 14 R. Chandrasekar, F. Schramm, O. Fuhr and M. Ruben, *Eur. J. Inorg. Chem.*, 2008, **2008**, 2649–2653.
- 15 M. Nihei, L. Han, H. Tahira and H. Oshio, *Inorg. Chim. Acta*, 2008, **361**, 3926–3930.
- 16 M. A. Halcrow, *Coord. Chem. Rev.*, 2009, **253**, 2493–2514.
- 17 C. A. Tovee, C. A. Kilner, J. A. Thomas and M. A. Halcrow, *CrystEngComm*, 2009, **11**, 2069.
- 18 M. Haryono, F. W. Heinemann, K. Petukhov, K. Gieb, P. Müller and A. Grohmann, *Eur. J. Inorg. Chem.*, 2009, **2009**, 2136–2143.
- 19 I. Šalitroš, J. Pavlik, R. Boča, O. Fuhr, C. Rajadurai and M. Ruben, *CrystEngComm*, 2010, **12**, 2361–2368.
- 20 M. Nihei, H. Tahira, N. Takahashi, Y. Otake, Y. Yamamura, K. Saito and H. Oshio, *J. Am. Chem. Soc.*, 2010, **132**, 3553–3560.
- 21 Y. Hasegawa, K. Takahashi, S. Kume and H. Nishihara, *Chem. Commun.*, 2011, **47**, 6846–6848.
- 22 M. Nihei, N. Takahashi, H. Nishikawa and H. Oshio, *Dalton Trans.*, 2011, **40**, 2154–2156.
- 23 R. González-Prieto, B. Fleury, F. Schramm, G. Zoppellaro, R. Chandrasekar, O. Fuhr, S. Lebedkin, M. Kappes and M. Ruben, *Dalton Trans.*, 2011, **40**, 7564–7570.
- 24 I. Šalitroš, O. Fuhr, A. Eichhöfer, R. Kruk, J. Pavlik, L. Dlháň, R. Boča and M. Ruben, *Dalton Trans.*, 2012, **41**, 5163–5171.
- 25 K. Takahashi, Y. Hasegawa, R. Sakamoto, M. Nishikawa, S. Kume, E. Nishibori and H. Nishihara, *Inorg. Chem.*, 2012, **51**, 5188–5198.
- 26 I. Šalitroš, O. Fuhr, R. Kruk, J. Pavlik, L. Pogány, B. Schäfer, M. Tatarko, R. Boča, W. Linert and M. Ruben, *Eur. J. Inorg. Chem.*, 2013, **2013**, 1049–1057.
- 27 Y. Hasegawa, R. Sakamoto, K. Takahashi and H. Nishihara, *Inorg. Chem.*, 2013, **52**, 1658–1665.
- 28 R. J. Davidson, E. W. Ainscough, A. M. Brodie, M. R. Waterland, H. R. Allcock, M. D. Hindenlang, B. Moubaraki, K. S. Murray, K. C. Gordon, R. Horvath and G. N. L. Jameson, *Inorg. Chem. Commun.*, 2013, **37**, 158–161.
- 29 A. Abhervé, M. Clemente-León, E. Coronado, C. J. Gómez-García and M. López-Jordà, *Dalton Trans.*, 2014, **43**, 9406–9409.
- 30 L. J. Kershaw Cook, H. J. Shepherd, T. P. Comyn, C. Baldé, O. Cespedes, G. Chastanet and M. A. Halcrow, *Chem. Eur. J.*, 2015, **21**, 4805–4816.
- 31 L. J. Kershaw Cook, R. Mohammed, G. Sherborne, T. D. Roberts, S. Alvarez and M. A. Halcrow, *Coord. Chem. Rev.*, 2015, **289–290**, 2–12.
- 32 L. J. Kershaw Cook, J. Fisher, L. P. Harding and M. A. Halcrow, *Dalton Trans.*, 2015, **44**, 9417–9425.
- 33 L. J. Kershaw Cook, R. Kulmaczewski, S. A. Barrett and M. A. Halcrow, *Inorg. Chem. Front.*, 2015, **2**, 662–670.
- 34 L. J. Kershaw Cook, F. L. Thorp-Greenwood, T. P. Comyn, O. Cespedes, G. Chastanet and M. A. Halcrow, *Inorg. Chem.*, 2015, **54**, 6319–6330.

- 35 L. Pukenas, F. Benn, E. Lovell, A. Santoro, L. J. Kershaw Cook, M. A. Halcrow and S. D. Evans, *J. Mater. Chem. C*, 2015, **3**, 7890–7896.
- 36 A. Abhervé, M. Palacios-Corella, J. M. Clemente-Juan, R. Marx, P. Neugebauer, J. van Slageren, M. Clemente-León and E. Coronado, *J. Mater. Chem. C*, 2015, **3**, 7936–7945.
- 37 L. J. Kershaw Cook and M. A. Halcrow, *Magnetochemistry*, 2015, **1**, 3–16.
- 38 L. J. Kershaw Cook, R. Kulmaczewski, R. Mohammed, S. Dudley, S. A. Barrett, M. A. Little, R. J. Deeth and M. A. Halcrow, *Angew. Chem. Int. Ed.*, 2016, **55**, 4327–4331.
- 39 L. J. Kershaw Cook, R. Kulmaczewski, O. Cespedes and M. A. Halcrow, *Chem. Eur. J.*, 2016, **22**, 1789–1799.
- 40 A. Abhervé, M. J. Recio-Carretero, M. López-Jordà, J. M. Clemente-Juan, J. Canet-Ferrer, A. Cantarero, M. Clemente-León and E. Coronado, *Inorg. Chem.*, 2016, **55**, 9361–9367.
- 41 R. Kulmaczewski, E. Trzop, L. J. Kershaw Cook, E. Collet, G. Chastanet and M. A. Halcrow, *Chem. Commun.*, 2017, **53**, 13268–13271.
- 42 B. Schäfer, T. Bauer, I. Faus, J. A. Wolny, F. Dahms, O. Fuhr, S. Lebedkin, H.-C. Wille, K. Schlage, K. Chevalier, F. Rupp, R. Diller, V. Schünemann, M. M. Kappes and M. Ruben, *Dalton Trans.*, 2017, **46**, 2289–2302.
- 43 N. Bridonneau, L. Rigamonti, G. Poneti, D. Pinkowicz, A. Forni and A. Cornia, *Dalton Trans.*, 2017, **46**, 4075–4085.
- 44 K. S. Kumar, I. Šalitroš, E. Moreno-Pineda and M. Ruben, *Dalton Trans.*, 2017, **46**, 9765–9768.
- 45 I. Capel Berdiell, R. Kulmaczewski, O. Cespedes and M. A. Halcrow, *Chem. Eur. J.*, 2018, **24**, 5055–5059.
- 46 V. García-López, M. Palacios-Corella, A. Abhervé, I. Pellicer-Carreño, C. Desplanches, M. Clemente-León and E. Coronado, *Dalton Trans.*, 2018, **47**, 16958–16968.
- 47 H. Douib, L. Cornet, J. F. Gonzalez, E. Trzop, V. Dorcet, A. Gouasmia, L. Ouahab, O. Cador and F. Pointillart, *Eur. J. Inorg. Chem.*, 2018, 4452–4457.
- 48 K. S. Kumar, I. Šalitroš, N. Suryadevara, E. Moreno-Pineda and M. Ruben, *Eur. J. Inorg. Chem.*, 2018, **2018**, 5091–5097.
- 49 I. Galadzhun, R. Kulmaczewski, O. Cespedes, M. Yamada, N. Yoshinari, T. Konno and M. A. Halcrow, *Inorg. Chem.*, 2018, **57**, 13761–13771.
- 50 M. Attwood, H. Akutsu, L. Martin, D. Cruickshank and S. S. Turner, *Dalton Trans.*, 2019, **48**, 90–98.
- 51 K. Senthil Kumar, B. Heinrich, S. Vela, E. Moreno-Pineda, C. Bailly and M. Ruben, *Dalton Trans.*, 2019, **48**, 3825–3830.
- 52 I. Šalitroš, R. Herchel, O. Fuhr, R. González-Prieto and M. Ruben, *Inorg. Chem.*, 2019, **58**, 4310–4319.
- 53 I. Galadzhun, R. Kulmaczewski and M. A. Halcrow, *Magnetochemistry*, 2019, **5**, 9.
- 54 V. García-López, M. Palacios-Corella, M. Clemente-León and E. Coronado, *Polyhedron*, 2019, **170**, 95–100.
- 55 K. Senthil Kumar, N. Del Giudice, B. Heinrich, L. Douce and M. Ruben, *Dalton Trans.*, 2020, **49**, 14258–14267.
- 56 I. Capel Berdiell, R. Kulmaczewski, S. L. Warriner, O. Cespedes and M. A. Halcrow, *Eur. J. Inorg. Chem.*, 2020, **2020**, 4334–4340.
- 57 R. Kulmaczewski, E. Trzop, E. Collet, S. Vela and M. A. Halcrow, *J. Mater. Chem. C*, 2020, **8**, 8420–8429.
- 58 R. Kulmaczewski, F. Bamiduro, N. Shahid, O. Cespedes and M. A. Halcrow, *Chem. Eur. J.*, 2021, **27**, 2082–2092.
- 59 I. Capel Berdiell, V. García-López, M. J. Howard, M. Clemente-León and M. A. Halcrow, *Dalton Trans.*, 2021, **50**, 7417–7426.
- 60 I. T. Jolliffe, *Principal component analysis*, Springer, New York, 2nd ed., 2002.
- 61 R. Bro and A. K. Smilde, *Anal. Methods*, 2014, **6**, 2812–2831.
- 62 K. Varmuza and P. Filzmoser, *Introduction to Multivariate Statistical Analysis in Chemometrics*, CRC Press, Boca Raton, 1st Edition., 2016.
- 63 M. Li Vigni, C. Durante and M. Cocchi, in *Data Handling in Science and Technology*, Elsevier, 2013, vol. 28, pp. 55–126.
- 64 S. Wold, E. Johansson and M. Cocchi, *3D QSAR in drug design. Vol. 1: Theory, methods and applications / ed. by Hugo Kubinyi*, Kluwer/ESCOM, Dordrecht, the Netherlands, 1993, vol. 1.
- 65 R. Bro, K. Kjeldahl, A. K. Smilde and H. A. L. Kiers, *Anal. Bioanal. Chem.*, 2008, **390**, 1241–1251.
- 66 J. Camacho and A. Ferrer, *Chemom. Intell. Lab. Syst.*, 2014, **131**, 37–50.

- 67 P. Geladi and B. R. Kowalski, *Anal. Chim. Acta*, 1986, **185**, 1–17.
- 68 U. G. Indahl, H. Martens and T. Næs, *J. Chemometrics*, 2007, **21**, 529–536.
- 69 G. M. Sheldrick, *SADABS-2008/1 - Bruker AXS Area Detector Scaling and Absorption Correction*, Bruker AXS, Madison, WI 2008, .
- 70 G. M. Sheldrick, *Acta Crystallogr. C*, 2015, **71**, 3–8.
- 71 C. F. Macrae, I. Sovago, S. J. Cottrell, P. T. A. Galek, P. McCabe, E. Pidcock, M. Platings, G. P. Shields, J. S. Stevens, M. Towler and P. A. Wood, *J. Appl. Crystallogr.*, 2020, **53**, 226–235.
